# Supplementary material for: Inexpensive and bench stable diarylmethylium tetrafluoroborates as organocatalysts in the light mediated hydrosulfonylation of unactivated alkenes
Source: Royal Society of Chemistry journal article supplement (doi:10.1039/d3sc00182b), 2023-01-01
Supplement: d3sc00182b2.pdf [file d3sc00182b2.pdf]

## Supporting Information Computational Data

### Inexpensive and Bench Stable Diarylmethylm Tetrafluoroborates as Organocatalysts in the Light Mediated Hydrosulfonylation of Unactivated Alkenes.

Polyssena Renzi, Emanuele Azzi, Sylvain Ascensio, Stefano Parisotto, Fabrizio Sordello,  
Francesco Pellegrino, Giovanni Ghigo,\* Annamaria Deagostino\*

Department of Chemistry, University of Torino, Via Pietro Giuria, 7, 10125 Torino, Italy.

\* Corresponding author: giovanni.ghigo@unito.it annamaria.deagostino@unito.it

#### INDEX

|                                                                                                                                                                                                                                   |      |
|-----------------------------------------------------------------------------------------------------------------------------------------------------------------------------------------------------------------------------------|------|
| Computational method.                                                                                                                                                                                                             | S-2  |
| The molecular and electronic structure of the catalyst <b>I</b> and the role of the solvent.                                                                                                                                      | S-3  |
| <b>Figure S-1.</b> Natural Atomic Group charges and LUMO of the anti-Indolynium <b>I</b> <sup>+</sup> .                                                                                                                           | S-4  |
| <b>Figure S-2.</b> HOMO and LUMO of the ion-couple <i>anti</i> -Indolynium <b>I</b> <sup>+</sup> BF <sub>4</sub> <sup>-</sup> .                                                                                                   | S-4  |
| <b>Figure S-3.</b> Differential density map for the first excited state of the S–C adduct <b>AD</b> .                                                                                                                             | S-5  |
| <b>Figure S-4a.</b> HOMO and LUMO of the complex <b>A</b> between <b>I</b> and <b>2a</b> .                                                                                                                                        | S-5  |
| <b>Figure S-4b.</b> The complex <b>A'</b> between <b>I</b> <sup>+</sup> and <b>2a</b> <sup>-</sup> .                                                                                                                              | S-5  |
| <b>Figure S-4c.</b> HOMO and LUMO of the complex <b>A'</b> between <b>I</b> <sup>+</sup> and <b>2a</b> <sup>-</sup> .                                                                                                             | S-6  |
| <b>Figure S-5.</b> Natural Atomic Group charges in the complex <b>A</b> between the sodium phenylsulfinate <b>2a</b> <sup>-</sup> and the catalyzer <b>I</b> <sup>+</sup> and in its first excited state <b>S<sub>1</sub>-A</b> . | S-6  |
| <b>Figure S-6.</b> Energy profile of the PCET in the reduced complex <b>CA</b> between the radical <b>3d</b> <sup>•</sup> and the acetic acid.                                                                                    | S-7  |
| <b>Tables S-1a – S-3b.</b> Calculated absolute and relative energies:                                                                                                                                                             |      |
| <b>Table S-1a.</b> Configurations of the Indolynium <b>I</b> <sup>+</sup> in CH <sub>2</sub> Cl <sub>2</sub> .                                                                                                                    | S-8  |
| <b>Table S-1b.</b> Configurations of the ion-couple AS14 <b>I</b> <sup>+</sup> BF <sub>4</sub> <sup>-</sup> in CH <sub>2</sub> Cl <sub>2</sub> .                                                                                  | S-8  |
| <b>Table S-1c.</b> Ion-couple AS14 <b>I</b> <sup>+</sup> BF <sub>4</sub> <sup>-</sup> and separated ions in water.                                                                                                                | S-9  |
| <b>Table S-2a.</b> Generation of the photo-active complex <b>A</b> from <b>2a</b> and <b>I</b> in CH <sub>2</sub> Cl <sub>2</sub> .                                                                                               | S-10 |
| <b>Table S-2b.</b> Generation of the radical <b>2a</b> <sup>•</sup> from <b>2a</b> <sup>-</sup> and <b>I</b> <sup>+</sup> in CH <sub>2</sub> Cl <sub>2</sub> .                                                                    | S-11 |
| <b>Table S-2c.</b> Reactions from the radical <b>2a</b> <sup>•</sup> to the products in CH <sub>2</sub> Cl <sub>2</sub> .                                                                                                         | S-12 |
| <b>Table S-2d</b> <sup>•</sup> . Whole reaction in CH <sub>2</sub> Cl <sub>2</sub> .                                                                                                                                              | S-14 |
| <b>Table S-2d</b> <sup>••</sup> . Whole reaction in water.                                                                                                                                                                        | S-14 |
| <b>Pictures and Cartesian coordinates</b> of optimized structures M06-2X/def2-TZVP.                                                                                                                                               | S-15 |

## Computational method.

The structures of the reactants, intermediates and transition states have been optimized by using the density functional method (DFT)<sup>1</sup> with the functional M0-2X<sup>2,3</sup> and the basis sets def2-SVP.<sup>4</sup> The electronic energy values were refined by re-optimization with the basis set def2-TZVP.<sup>5</sup> The nature of the critical points was characterized by using vibrational analysis<sup>6</sup> which also furnished the Zero Point Energies (ZPE) and entropies for the calculations of the Free Energies. These have been converted from the gas phase to the 1 M standard state at 1 atm and 298.15 K.<sup>7</sup> The solvent effects (dichloromethane and water for some cases) were introduced in all calculations using the universal solvation model (SMD) by Truhlar *et al.*<sup>8</sup> The singlet excited states have been optimized with the Time-Dependent DFT.<sup>9</sup> The calculations were performed by the quantum package Gaussian 16-A.03<sup>10</sup> The figures were obtained using the graphical program Molden.<sup>11</sup>

[1] R.G. Parr, Density Functional Theory of Atoms and Molecules, in: Horizons Quantum Chem., Springer Netherlands, 1980: pp. 5–15. DOI:10.1007/978-94-009-9027-2\_2.

[2] Y. Zhao, D.G. Truhlar, The M06 suite of density functionals for main group thermochemistry, thermochemical kinetics, noncovalent interactions, excited states, and transition elements: Two new functionals and systematic testing of four M06-class functionals and 12 other function, *Theor. Chem. Acc.* 120 (2008) 215–241, DOI: 10.1007/s00214-007-0310-x.

[3] Y. Zhao, D.G. Truhlar, Density functionals with broad applicability in chemistry, *Acc. Chem. Res.* 41 (2008) 157–167, DOI: 10.1021/ar700111a.

[4] A. Schaefer, H. Horn, and R. Ahlrichs, “Fully optimized contracted Gaussian-basis sets for atoms Li to Kr,” *J. Chem. Phys.*, 97 (1992) 2571–2577. DOI: 10.1063/1.463096.

[5] A. Schaefer, C. Huber, and R. Ahlrichs, “Fully optimized contracted Gaussian-basis sets of triple zeta valence quality for atoms Li to Kr,” *J. Chem. Phys.*, 100 (1994) 5829–5835. DOI: 10.1063/1.467146 .

[6] J. Foresman, A. Frisch, Exploring chemistry with electronic structure methods, 1996, Gaussian Inc, Pittsburgh, PA, 1996, <http://gaussian.com/expchem3/>(accessed June 4, 2021).

[7] R.F. Ribeiro, A.V. Marenich, C.J. Cramer, D.G. Truhlar, Use of solution-phase vibrational frequencies in continuum models for the free energy of solvation, *J. Phys. Chem. B.* 115 (2011) 14556–14562, DOI: 10.1021/jp205508z.

[8] A. V. Marenich, C. J. Cramer, and D. G. Truhlar, “Universal solvation model based on solute electron density and a continuum model of the solvent defined by the bulk dielectric constant and atomic surface tensions,” *J. Phys. Chem. B.* 113 (2009) 6378–6396. DOI: 10.1021/jp810292n .

[9] F. Furche and R. Ahlrichs, “Adiabatic time-dependent density functional methods for excited state properties,” *J. Chem. Phys.*, 117 (2002) 7433–7447. DOI: 10.1063/1.1508368

[10] D.J. Frisch, M. J.; Trucks, G. W.; Schlegel, H. B.; Scuseria, G. E.; Robb, M. A.; Cheeseman, J. R.; Scalmani, G.; Barone, V.; Petersson, G. A.; Nakatsuji, H.; Li, X.; Caricato, M.; Marenich, A. V.; Bloino, J.; Janesko, B. G.; Gomperts, R.; Mennucci, B.; Hratch, Gaussian 16, Revision A.03, (2016).

[11] G. Schaftenaar, J.H. Noordik, Molden: A pre- and post-processing program for molecular and electronic structures, *J. Comput. Aided. Mol. Des.* 14 (2000) 123–134, DOI: 10.1023/A:1008193805436.

### The molecular and electronic structure of the catalyst **I** and the role of the solvent.

The catalyst **I** is the 1,2-Dimethyl-3-(2-methoxynaphth-1-yl-methenyl)-indolynium (hereafter, indolynium **I**<sup>+</sup>) tetrafluoroborate. Here we report the result of the analysis of its possible configurations and conformation.

Considering the rotation of the 2-methoxynaphth-1-yl moiety with respects to the indole plane, the indolynium **I**<sup>+</sup> exists in two conformations, *anti* and *syn* (each one with its enantiomer) with the same energies (Table S-1a in the SI). The group charges and the shape of the LUMO are coherent with the delocalization of the positive charge on the  $\pi$  system of the indol and methenyl (C<sup>10</sup>) moieties and a small contribution of the aromatic ring of the naphthyl bound through the C<sup>10</sup> to the indol moiety (see Figure S-1 in the SI). The addition of the counter-ion tetrafluoroborate generates at least eight ion-couples **C**<sup>+</sup> BF<sub>4</sub><sup>-</sup> whose free energies span by only 2.3 kcal mol<sup>-1</sup> (Table S-1b in the SI). The electrostatic interaction is not specific therefore BF<sub>4</sub><sup>-</sup> can assume different positions with almost the same energy. Interestingly, the most stable ion-couple is isoergic with the dissociated carbocation and BF<sub>4</sub><sup>-</sup>. However, we must take in account that the real environment is not that of the pure dichloromethane as used for in the calculations, but possibly a more polar environment because of the presence of large amounts of water and acetic acid. As a matter of fact, the dissociation of the ion-couple when calculated in water (Table S-1c in the SI) is thermodynamically favored ( $\Delta G = -5.6$  kcal mol<sup>-1</sup> vs  $-0.03$  in CH<sub>2</sub>Cl<sub>2</sub>). We assumed that the correct value should be somewhere in the middle.

The charges on the catalyzer are quite delocalized so the interaction with the solvent are expected to be non too strong and the SMD solvation model is expected to be reliable. By contrast, in the case of the sodium phenylsulphinate **2a**, the charges are more localized. This is, of course, particularly true for the sodium cation. Therefore, the interaction with the solvent are expected to be stronger and more specific, so, the SMD solvation model could be not reliable. Moreover, as observed above, the presence of water and acetic acid makes the modeling of the solvent even more difficult. As a consequence, the energy differences that imply different levels of solvation of the components and derivatives of **2a** cannot be taken as very accurate. For a recent discussion on the solvation of ionic species see, for example, M. Bensberg, P. L. Türtcher, J. P. Unsleber, M. Reiher, J. Neugebauer "Solvation Free Energies in Subsystem Density Functional Theory." *J. Chem. Theory Comput.* **2022**, *18*, 723–740

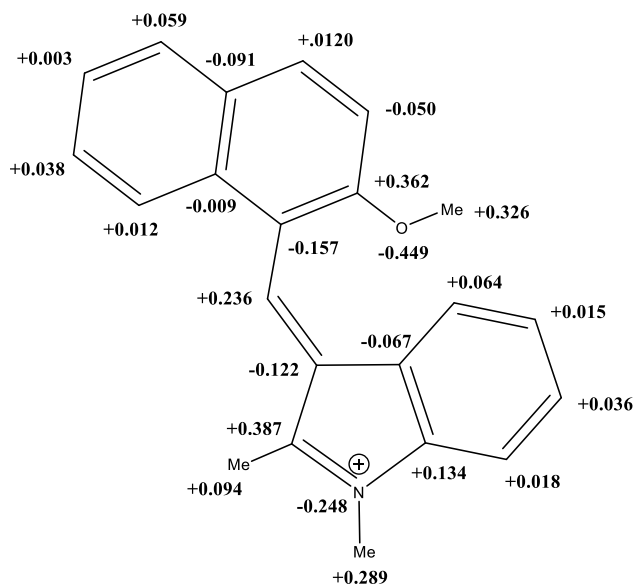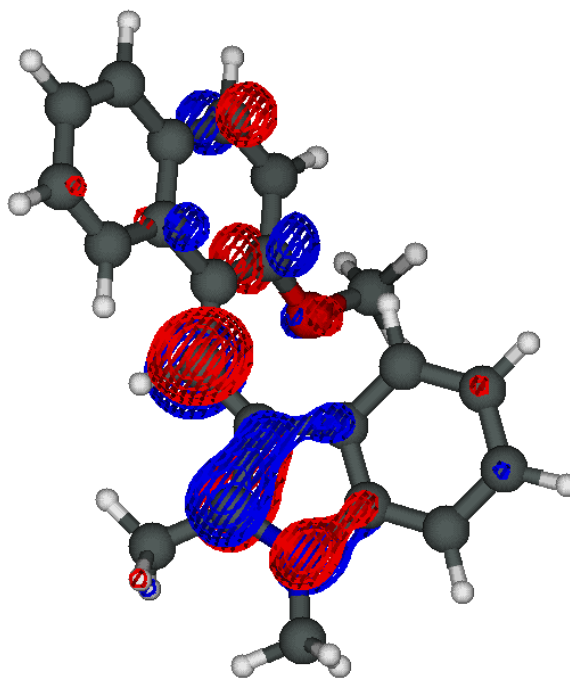

Figure S-1. Natural Atomic Group charges (left) and LUMO (right) of the *anti*-Indolynium I<sup>+</sup>.

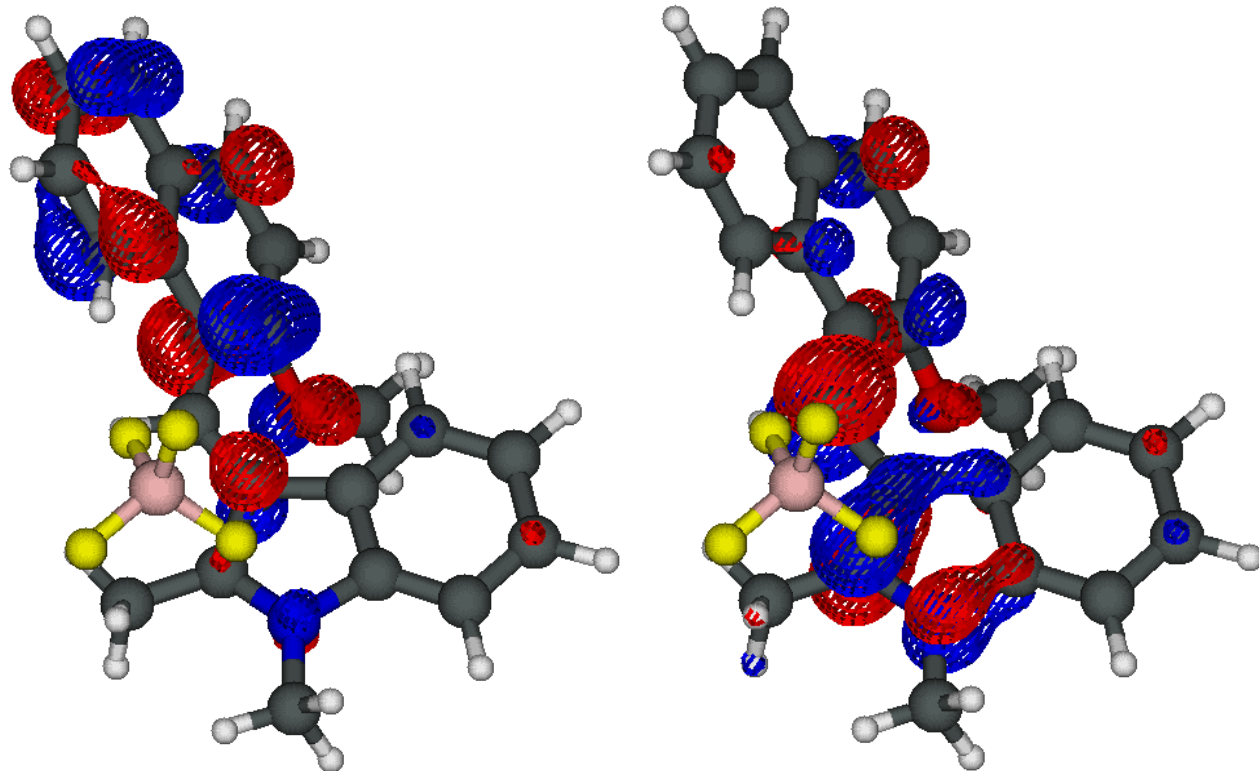

Figure S-2. HOMO (left) and LUMO (right) of the ion-couple *anti*-Indolynium I<sup>+</sup> BF<sub>4</sub><sup>-</sup>.

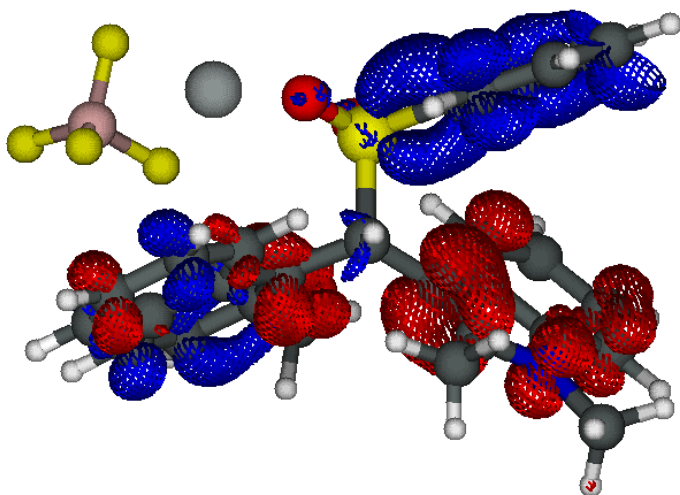

**Figure S-3.** Differential density map for the first excited state of the S-C adduct **AD**. Right, the red areas correspond to a reduction in the electronic density when going from  $S_0$  to  $S_1$ , and the blue areas correspond to an increase in the electronic density.

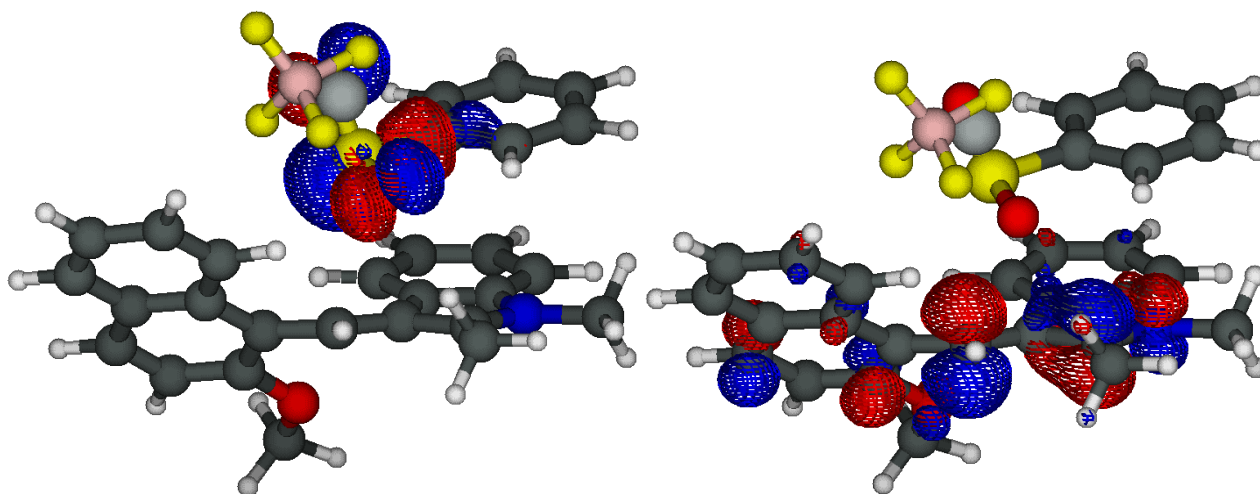

**Figure S-4a.** HOMO (left) and LUMO (right) of the complex **A** between **I** and the phenylsulfinate **2a**.

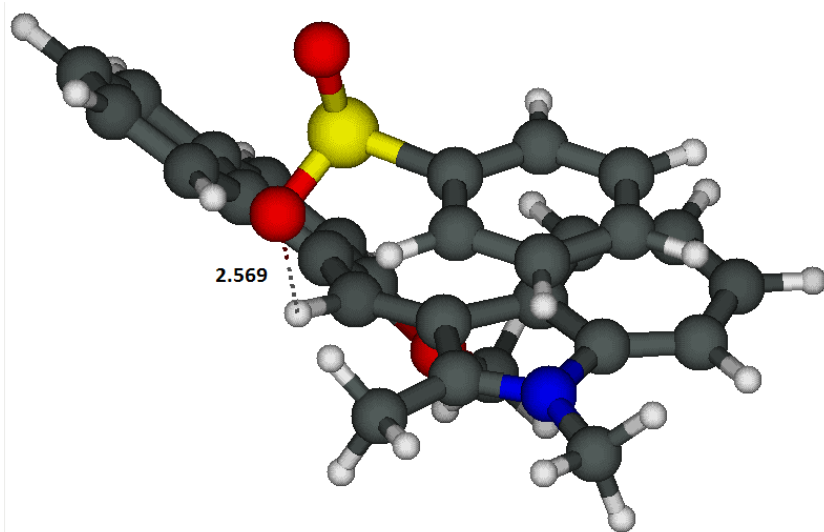

**Figure S-4b.** Complex **A'** between  $I^+$  and the phenylsulfinate  $2a^-$ .

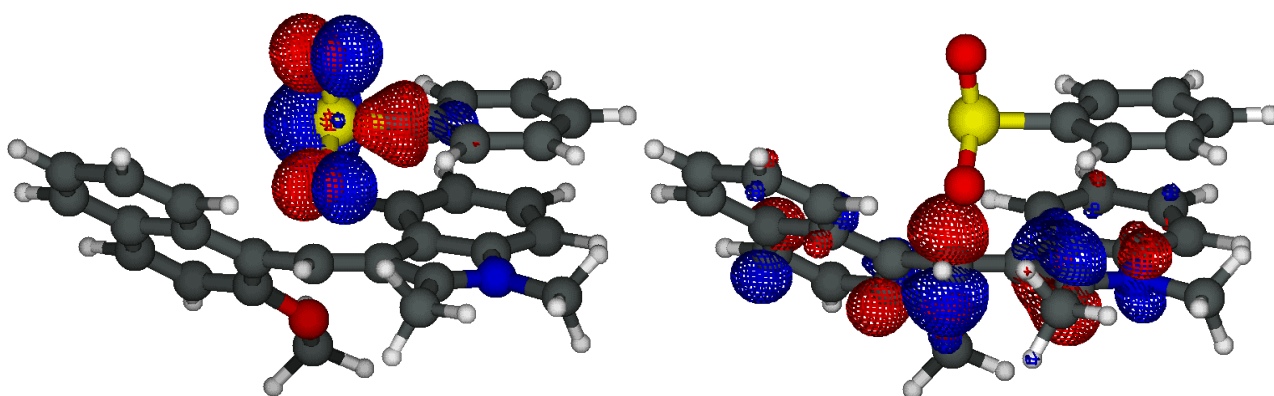

**Figure S-4c.** HOMO (left) and LUMO (right) of the complex  $A'$  between  $I^+$  and the phenylsulfinate  $2a^-$ .

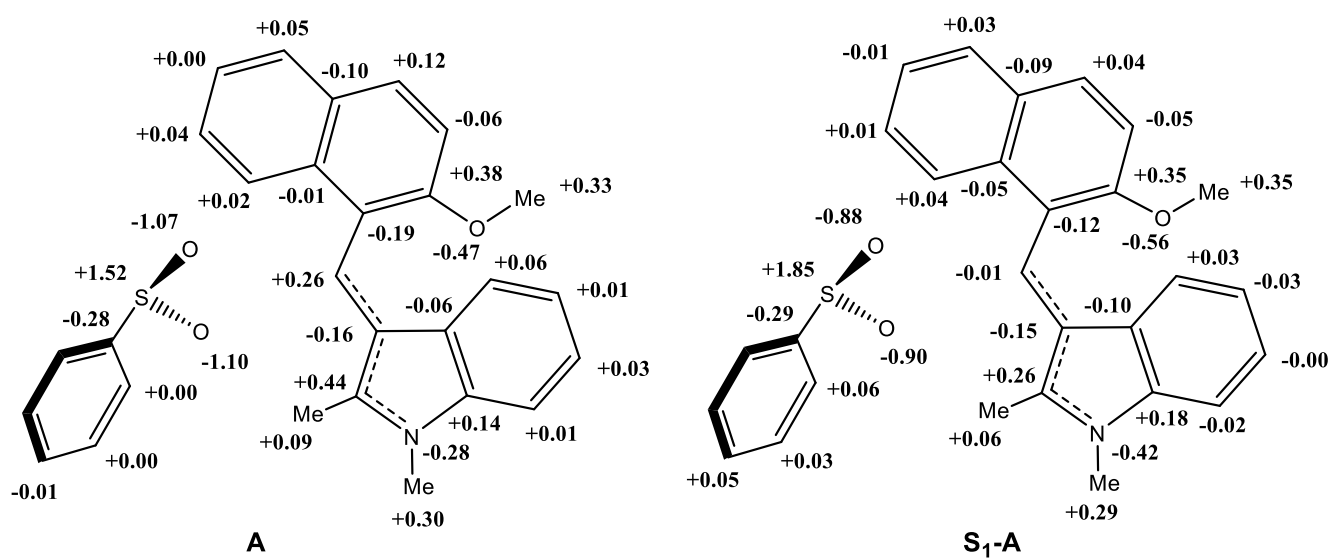

**Figure S-5.** Natural Atomic Group charges in the complex  $A'$  between the phenylsulfinate  $2a^-$  and the *anti*-indolynium  $I^+$  (left) and in its first excited state  $S_1-A'^*$  (right). The phenylsulfinate has been reoriented for clarity.

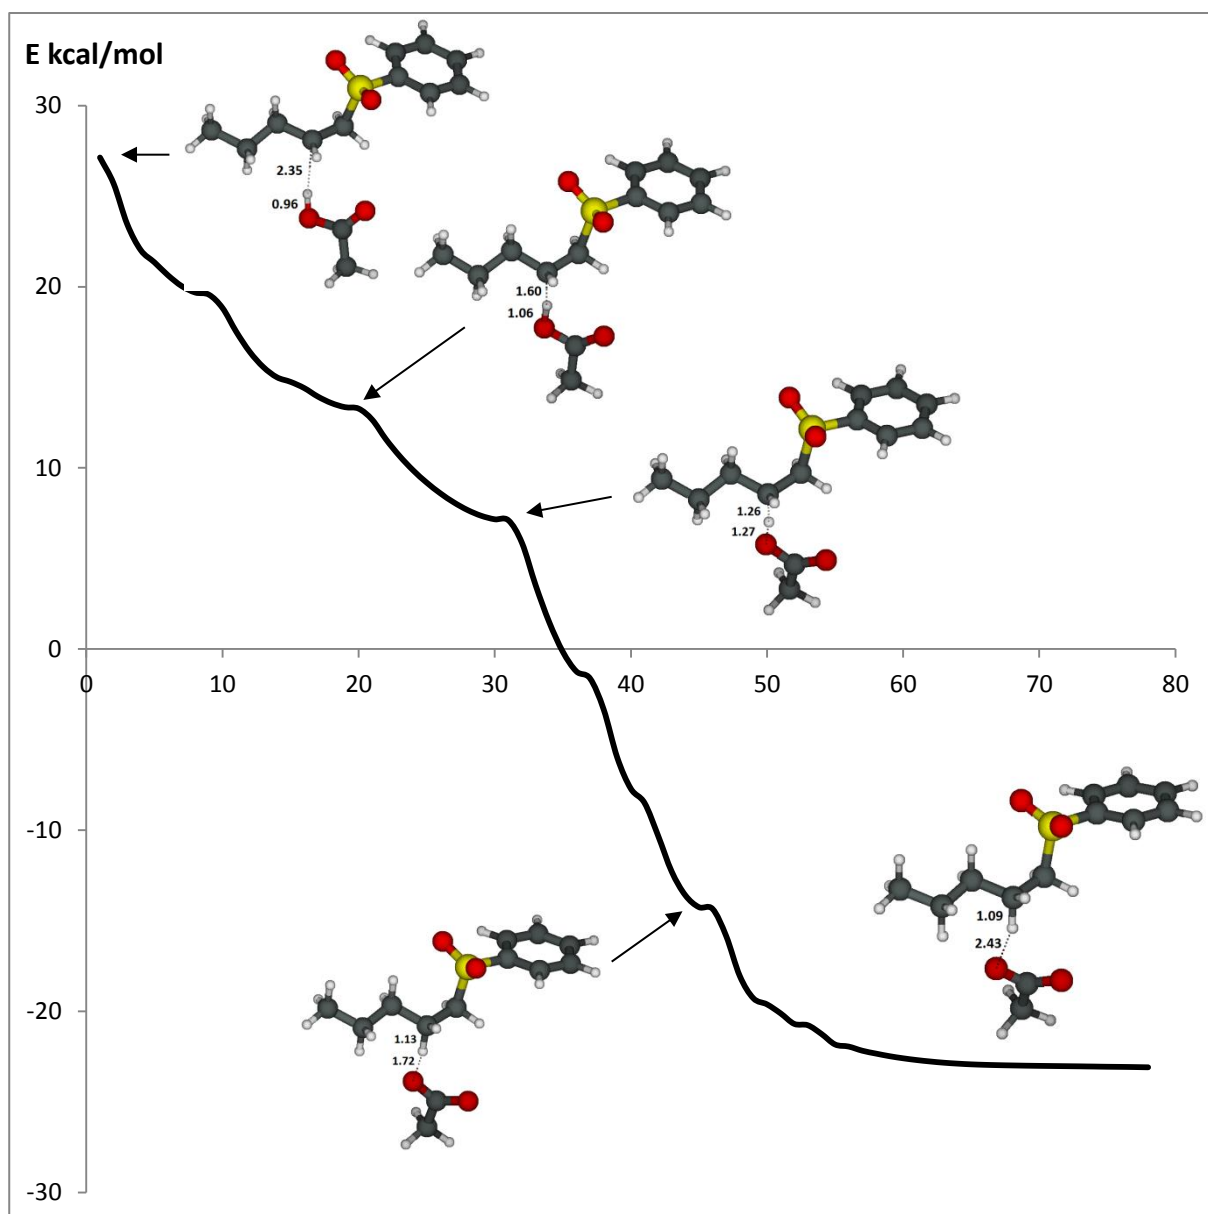

**Figure S-6.** Energy profile of the PCET in the reduced complex **CA** between the radical **3d'** and the acetic acid.

**Table S-1a.** Calculated absolute and relative (in kcal mol<sup>-1</sup>) energies of the configurations of the Indolynium I<sup>+</sup> in CH<sub>2</sub>Cl<sub>2</sub>.

| Table S-1a              | I <sup>+(x)</sup> | E /au <sup>a</sup> | $\Delta E^a$ | ZPE /au <sup>a</sup> | $\delta G^{298K} /au^a$ | E TZ(D)/ au <sup>b</sup> | $\Delta E^b$ | E <sup>0K</sup> TZ(D)/ au <sup>c</sup> | $\Delta E^{0K}$ | G TZ(D) / au <sup>c</sup> | $\Delta G^{298K}$ |
|-------------------------|-------------------|--------------------|--------------|----------------------|-------------------------|--------------------------|--------------|----------------------------------------|-----------------|---------------------------|-------------------|
| <i>anti</i> -MeO Cation | <i>a</i>          | -979.101504        | <b>0.00</b>  | 0.367875             | 0.319918                | -980.173815              | <b>0.00</b>  | -979.805940                            | <b>0.00</b>     | -979.853897               | <b>0.00</b>       |
| <i>syn</i> -MeO Cation  | <i>s</i>          | -979.100085        | <b>0.89</b>  | 0.367260             | 0.318828                | -980.172734              | <b>0.68</b>  | -979.805474                            | <b>0.29</b>     | -979.853906               | <b>-0.01</b>      |

<sup>a</sup> M06-2X/def2-SVP; <sup>b</sup> M06-2X/def2-TZVP; <sup>c</sup> M06-2X/def2-TZVP energies combined with thermal corrections M06-2X/def2-SVP.

**Table S-1b.** Calculated absolute and relative (in kcal mol<sup>-1</sup>) energies of the configurations of the ion-couple AS14, I<sup>+</sup> BF<sub>4</sub><sup>-</sup> in CH<sub>2</sub>Cl<sub>2</sub>.

| Table S-1b                                          | I <sup>+(x,y)</sup> | E /au <sup>a</sup> | $\Delta E^a$ | ZPE /au <sup>a</sup> | $\delta G^{298K} /au^a$ | E TZ(D)/ au <sup>b</sup> | $\Delta E^b$ | E <sup>0K</sup> TZ(D)/ au <sup>c</sup> | $\Delta E^{0K}$ | G TZ(D) / au <sup>c</sup> | $\Delta n$ | $\Delta G^{298K}$ |
|-----------------------------------------------------|---------------------|--------------------|--------------|----------------------|-------------------------|--------------------------|--------------|----------------------------------------|-----------------|---------------------------|------------|-------------------|
| <i>anti</i> -MeO, <i>anti</i> (MeO)-BF <sub>4</sub> | <i>a,a</i>          | -1403.278588       | <b>0.00</b>  | 0.383544             | 0.325757                | -1404.872015             | <b>0.00</b>  | -1404.488471                           | <b>0.00</b>     | -1404.546258              | <b>0</b>   | <b>0.00</b>       |
| <i>anti</i> -MeO, <i>syn</i> (MeO)-BF <sub>4</sub>  | <i>a,s</i>          | -1403.279124       | <b>-0.34</b> | 0.382939             | 0.325881                | -1404.871706             | <b>0.19</b>  | -1404.488767                           | <b>-0.19</b>    | -1404.545825              |            | <b>0.27</b>       |
| <i>syn</i> -MeO, <i>anti</i> (MeO)-BF <sub>4</sub>  | <i>s,a</i>          | -1403.281360       | <b>-1.74</b> | 0.383330             | 0.326713                | -1404.872874             | <b>-0.54</b> | -1404.489545                           | <b>-0.67</b>    | -1404.546162              |            | <b>0.06</b>       |
| <i>syn</i> -MeO, <i>syn</i> (MeO)-BF <sub>4</sub>   | <i>s,s</i>          | -1403.277236       | <b>0.85</b>  | 0.383272             | 0.325631                | -1404.871137             | <b>0.55</b>  | -1404.487864                           | <b>0.38</b>     | -1404.545505              |            | <b>0.47</b>       |
| <i>anti</i> -MeO, <i>perp</i> -BF <sub>4</sub>      | <i>a,p</i>          | -1403.279686       | <b>-0.69</b> | 0.383670             | 0.326196                | -1404.871895             | <b>0.07</b>  | -1404.488226                           | <b>0.15</b>     | -1404.545700              |            | <b>0.35</b>       |
| <i>anti</i> -MeO, <i>on-plane</i> -BF <sub>4</sub>  | <i>a,pl</i>         | -1403.276463       | <b>1.33</b>  | 0.383468             | 0.325338                | -1404.869201             | <b>1.77</b>  | -1404.485733                           | <b>1.72</b>     | -1404.543863              |            | <b>1.50</b>       |
| <i>syn</i> -MeO, <i>perp</i> -BF <sub>4</sub>       | <i>s,p</i>          | -1403.274166       | <b>2.77</b>  | 0.383321             | 0.325152                | -1404.869179             | <b>1.78</b>  | -1404.485858                           | <b>1.64</b>     | -1404.544027              |            | <b>1.40</b>       |
| <i>syn</i> -MeO, <i>on-plane</i> -BF <sub>4</sub>   | <i>s,pl</i>         | -1403.273119       | <b>3.43</b>  | 0.383137             | 0.324370                | -1404.866930             | <b>3.19</b>  | -1404.483793                           | <b>2.94</b>     | -1404.542560              |            | <b>2.32</b>       |
| BF <sub>4</sub> Anion                               |                     | -424.153019        |              | 0.014756             | -0.012802               | -424.682628              |              | -424.667873                            |                 | -424.695431               |            |                   |
| <b>Separated Ions</b>                               |                     | -1403.254523       | <b>15.10</b> | 0.382631             | 0.307116                | -1404.856443             | <b>9.77</b>  | -1404.473813                           | <b>9.20</b>     | -1404.549328              | <b>1</b>   | <b>-0.03</b>      |

<sup>a</sup> M06-2X/def2-SVP; <sup>b</sup> M06-2X/def2-TZVP; <sup>c</sup> M06-2X/def2-TZVP energies combined with thermal corrections M06-2X/def2-SVP.



**Table S-1c.** Calculated absolute and relative (in kcal mol<sup>-1</sup>) energies of the ion-couple AS14 I<sup>+</sup> BF<sub>4</sub><sup>-</sup> and separated ions in water.

| <b>Table S-1c</b>                    | <b>I<sup>+(x)</sup></b> | <b>E /au<sup>a</sup></b> | <b>ΔE<sup>a</sup></b> | <b>ZPE /au<sup>a</sup></b> | <b>δG<sup>298K</sup> /au<sup>a</sup></b> | <b>E TZ(D)/ au<sup>b</sup></b> | <b>ΔE<sup>b</sup></b> | <b>E<sup>0K</sup> TZ(D)/ au<sup>c</sup></b> | <b>ΔE<sup>0K</sup></b> | <b>G TZ(D) / au<sup>c</sup></b> | <b>Δn</b> | <b>ΔG<sup>298K</sup></b> |
|--------------------------------------|-------------------------|--------------------------|-----------------------|----------------------------|------------------------------------------|--------------------------------|-----------------------|---------------------------------------------|------------------------|---------------------------------|-----------|--------------------------|
| <i>anti</i> -MeO, <i>anti</i> (MeO)- |                         |                          |                       |                            |                                          |                                |                       |                                             |                        |                                 |           |                          |
| BF <sub>4</sub>                      | <b><i>a,a</i></b>       | -1403.264082             | <b>0.00</b>           | 0.383613                   | 0.326721                                 | -1404.856978                   | <b>0.00</b>           | -1404.473365                                | <b>0.00</b>            | -1404.530257                    | <b>0</b>  | <b>0.00</b>              |
| <i>anti</i> -MeO Cation              | <b><i>a</i></b>         | -979.086402              |                       | 0.367090                   | 0.318423                                 | -980.159142                    |                       | -979.792052                                 |                        | -979.840719                     |           |                          |
| BF <sub>4</sub> Anion                |                         | -424.158941              |                       | 0.014718                   | -0.012839                                | -424.688569                    |                       | -424.673851                                 |                        | -424.701408                     |           |                          |
| <b>Separated Ions</b>                |                         | -1403.245343             | <b>11.76</b>          | 0.381808                   | 0.305584                                 | -1404.847711                   | <b>5.82</b>           | -1404.465903                                | <b>4.68</b>            | -1404.542127                    | <b>1</b>  | <b>-5.55</b>             |

<sup>a</sup> M06-2X/def2-SVP; <sup>b</sup> M06-2X/def2-TZVP; <sup>c</sup> M06-2X/def2-TZVP energies combined with thermal corrections M06-2X/def2-SVP.

**Table S-2a.** Calculated absolute and relative (in kcal mol<sup>-1</sup>) energies of the generation of the photo-active complex **A**<sup>\*</sup> from **2a** and **I** in CH<sub>2</sub>Cl<sub>2</sub>.

| Table S-2a                                       |           | E /au <sup>a</sup> | $\Delta E^a$  | ZPE /au <sup>a</sup> | $\delta G^{298K}$<br>/au <sup>a</sup> | E TZ(D)/ au <sup>b</sup> | $\Delta E^b$  | E <sup>0K</sup> TZ(D)/ au <sup>c</sup> | $\Delta E^{0K}$ | G TZ(D) / au <sup>c</sup> | $\Delta n$ | $\Delta G^{298K}$ |
|--------------------------------------------------|-----------|--------------------|---------------|----------------------|---------------------------------------|--------------------------|---------------|----------------------------------------|-----------------|---------------------------|------------|-------------------|
| <i>anti</i> -MeO, <i>anti</i> (MeO)-             |           |                    |               |                      |                                       |                          |               |                                        |                 |                           |            |                   |
| BF <sub>4</sub>                                  | <b>I</b>  | -1403.282845       |               | 0.383563             | 0.325957                              | -1404.876211             |               | -1404.492648                           |                 | -1404.550254              |            |                   |
| C <sub>6</sub> H <sub>5</sub> SO <sub>2</sub> Na | <b>2a</b> | -941.962390        |               | 0.100536             | 0.064633                              | -942.621206              |               | -942.520670                            |                 | -942.556573               |            |                   |
| <b>Rgts 2a + I</b>                               |           | -2345.245235       | <b>0.00</b>   | 0.484099             | 0.390590                              | -2347.497417             | <b>0.00</b>   | -2347.013318                           | <b>0.00</b>     | -2347.106827              | <b>0</b>   | <b>0.00</b>       |
| <b>C–S Adduct X</b>                              | <b>AD</b> | -2345.292562       | <b>-29.70</b> | 0.487121             | 0.415494                              | -2347.534990             | <b>-23.58</b> | -2347.047869                           | <b>-21.68</b>   | -2347.119496              | <b>-1</b>  | <b>-9.84</b>      |
| <b>Complex A</b>                                 | <b>A</b>  | -2345.288174       | <b>-26.94</b> | 0.485026             | 0.411854                              | -2347.527419             | <b>-18.83</b> | -2347.042393                           | <b>-18.24</b>   | -2347.115565              | <b>-1</b>  | <b>-7.38</b>      |

<sup>a</sup> M06-2X/def2-SVP; <sup>b</sup> M06-2X/def2-TZVP; <sup>c</sup> M06-2X/def2-TZVP energies combined with thermal corrections M06-2X/def2-SVP.

**Table S-2b.** Calculated absolute and relative (in kcal mol<sup>-1</sup>) energies of the generation of the radical **2a**<sup>•</sup> from **2a**<sup>-</sup> and I<sup>+</sup> in CH<sub>2</sub>Cl<sub>2</sub>.

| Table S-2b                                                     |                        | E /au <sup>a</sup> | $\Delta E^a$  | ZPE /au <sup>a</sup> | $\delta G^{298K}$<br>/au <sup>a</sup> | E TZ(D)/ au <sup>b</sup> | $\Delta E^b$   | E <sup>0K</sup> TZ(D)/ au <sup>c</sup> | $\Delta E^{0K}$ | G TZ(D) / au <sup>c</sup> | $\Delta n$ | $\Delta G^{298K}$ |
|----------------------------------------------------------------|------------------------|--------------------|---------------|----------------------|---------------------------------------|--------------------------|----------------|----------------------------------------|-----------------|---------------------------|------------|-------------------|
| <i>anti</i> -MeO Cation                                        | I <sup>+</sup>         | -979.104519        |               | 0.367382             | 0.318597                              | -980.176921              |                | -979.809539                            |                 | -979.858324               |            |                   |
| C <sub>6</sub> H <sub>5</sub> SO <sub>2</sub> Anion            | <b>2a</b> <sup>-</sup> | -779.767525        |               | 0.098720             | 0.065631                              | -780.395586              |                | -780.296866                            |                 | -780.329955               |            |                   |
| <b>Ox.</b> C <sub>6</sub> H <sub>5</sub> SO <sub>2</sub> Anion |                        |                    |               |                      |                                       | <b>-780.214409</b>       | <b>4.93 eV</b> |                                        |                 |                           |            |                   |
| <b>Ions 2a<sup>-</sup> + I<sup>+</sup></b>                     |                        | -1758.872045       | <b>0.00</b>   | 0.466103             | 0.384229                              | -1760.572507             | <b>0.00</b>    | -1760.106404                           | <b>0.00</b>     | -1760.188278              | <b>0</b>   | <b>0.00</b>       |
| <b>Complex A'</b>                                              | <b>A</b>               | -1758.909163       | <b>-23.29</b> | 0.467745             | 0.407375                              | -1760.597724             | <b>-15.82</b>  | -1760.129979                           | <b>-14.79</b>   | -1760.190349              | <b>-1</b>  | <b>-3.19</b>      |
| <b>Complex S<sub>1</sub>-A'<sup>*</sup></b>                    |                        | -1758.866587       | <b>3.42</b>   |                      |                                       | -1760.545659             | <b>16.85</b>   |                                        |                 |                           |            |                   |
| <b>Complex T<sub>1</sub> A'</b>                                |                        | -1758.879100       | <b>-4.43</b>  | 0.465134             | 0.402151                              | -1760.561815             | <b>6.71</b>    | -1760.096681                           | <b>6.10</b>     | -1760.159664              | <b>-1</b>  | <b>16.06</b>      |
| <i>anti</i> -MeO Radical                                       | I <sup>•</sup>         | -979.243199        |               | 0.364413             | 0.314966                              | -980.314750              |                | -979.950336                            |                 | -979.999783               |            |                   |
| C <sub>6</sub> H <sub>5</sub> SO <sub>2</sub> Radical          | <b>2a</b> <sup>•</sup> | -779.613116        |               | 0.099784             | 0.066233                              | -780.230838              |                | -780.131054                            |                 | -780.164605               |            |                   |
| <b>Radicals 2a<sup>-</sup> + I<sup>•</sup></b>                 |                        | -1758.856315       | <b>9.87</b>   | 0.464197             | 0.381199                              | -1760.545587             | <b>16.89</b>   | -1760.081390                           | <b>15.70</b>    | -1760.164388              | <b>0</b>   | <b>14.99</b>      |

<sup>a</sup> M06-2X/def2-SVP; <sup>b</sup> M06-2X/def2-TZVP; <sup>c</sup> M06-2X/def2-TZVP energies combined with thermal corrections M06-2X/def2-SVP.

**Table S-2c.** Calculated absolute and relative (in kcal mol<sup>-1</sup>) energies of the reactions from the radical **R-2a** to the products in CH<sub>2</sub>Cl<sub>2</sub>.

| Table S-2c                                            |                                                | E /au <sup>a</sup> | $\Delta E^a$  | ZPE /au <sup>a</sup> | $\delta G^{298K}$<br>/au <sup>a</sup> | E TZ(D)/ au <sup>b</sup> | $\Delta E^b$  | E <sup>0K</sup> TZ(D)/ au <sup>c</sup> | $\Delta E^{0K}$ | G TZ(D) / au <sup>c</sup> | $\Delta n$ | $\Delta G^{298K}$ |
|-------------------------------------------------------|------------------------------------------------|--------------------|---------------|----------------------|---------------------------------------|--------------------------|---------------|----------------------------------------|-----------------|---------------------------|------------|-------------------|
| 1-Pentene                                             | <b>1x</b>                                      | -196.279205        |               | 0.136924             | 0.106958                              | -196.504400              |               | -196.367475                            |                 | -196.397441               |            |                   |
| C <sub>6</sub> H <sub>5</sub> SO <sub>2</sub> Radical | <b>2a<sup>•</sup></b>                          | -779.613116        |               | 0.099784             | 0.066233                              | -780.230838              |               | -780.131054                            |                 | -780.164605               |            |                   |
| <b>Reactants 1x + 2a<sup>•</sup></b>                  |                                                | -975.892321        | <b>0.00</b>   | 0.236708             | 0.173191                              | -976.735237              | <b>0.00</b>   | -976.498529                            | <b>0.00</b>     | -976.562046               | <b>0</b>   | <b>0.00</b>       |
| <b>TS<sub>Add</sub></b>                               |                                                | -975.892052        | <b>0.17</b>   | 0.237484             | 0.191843                              | -976.733624              | <b>1.01</b>   | -976.496140                            | <b>1.50</b>     | -976.541781               | <b>-1</b>  | <b>10.82</b>      |
| <b>Radical Adduct 3d</b>                              | <b>3d<sup>•</sup></b>                          | -975.907468        | <b>-9.51</b>  | 0.239243             | 0.194960                              | -976.751851              | <b>-10.43</b> | -976.512608                            | <b>-8.83</b>    | -976.556891               | <b>-1</b>  | <b>1.34</b>       |
| AcOH                                                  |                                                | -228.823833        |               | 0.062241             | 0.035207                              | -229.097734              |               | -229.035493                            |                 | -229.062527               |            |                   |
| <i>anti</i> -MeO Radical                              | <b>I<sup>•</sup></b>                           | -979.243199        |               | 0.364413             | 0.314966                              | -980.314750              |               | -979.950336                            |                 | -979.999783               |            |                   |
| <b>3d<sup>•</sup> + AcOH + I<sup>•</sup></b>          |                                                | -2183.974501       | <b>0.00</b>   | 0.665898             | 0.545134                              | -2186.164335             | <b>0.00</b>   | -2185.498437                           | <b>0.00</b>     | -2185.619201              | <b>0</b>   | <b>0.00</b>       |
| Product                                               | <b>3d</b>                                      | -976.569322        |               | 0.253716             | 0.210769                              | -977.414128              |               | -977.160412                            |                 | -977.203359               |            |                   |
| AcO <sup>-</sup>                                      |                                                | -228.319884        |               | 0.048910             | 0.021839                              | -228.609806              |               | -228.560896                            |                 | -228.587967               |            |                   |
| <i>anti</i> -MeO Cation                               | <b>I<sup>+</sup></b>                           | -979.104519        |               | 0.367382             | 0.318597                              | -980.176921              |               | -979.809539                            |                 | -979.858324               |            |                   |
| <b>3d + AcO<sup>-</sup> + I<sup>+</sup></b>           |                                                | -2183.993725       | <b>-12.06</b> | 0.670008             | 0.551205                              | -2186.200855             | <b>-22.92</b> | -2185.530847                           | <b>-20.34</b>   | -2185.649650              | <b>0</b>   | <b>-19.11</b>     |
| <b>3d<sup>•</sup> + I<sup>•</sup></b>                 |                                                | -1955.150668       | <b>0.00</b>   | 0.603657             | 0.509927                              | -1957.066601             | <b>0.00</b>   | -1956.462944                           | <b>0.00</b>     | -1956.556674              | <b>0</b>   | <b>0.00</b>       |
| Reduced 3d <sup>•</sup>                               | <b>Not stable: breaks in 1-pentene and 2a'</b> |                    |               |                      |                                       | <b>-976.837591</b>       |               |                                        |                 |                           |            |                   |
| <b>Reduced 3d<sup>•</sup> + I<sup>+</sup></b>         |                                                |                    |               |                      |                                       | -1957.014512             | <b>32.69</b>  |                                        |                 |                           |            |                   |
| Cpl AcOH * 3d <sup>•</sup>                            | <b>CA</b>                                      | -1204.739497       | <b>-5.14</b>  | 0.302570             | 0.246552                              | -1205.854626             | <b>-5.14</b>  | -1205.552055                           | <b>-5.14</b>    | -1205.608073              | <b>-1</b>  | <b>7.13</b>       |
| <b>CA + I<sup>•</sup></b>                             |                                                | -2183.982697       | <b>0.00</b>   | 0.666984             | 0.561519                              | -2186.169363             | <b>0.00</b>   | -2185.502379                           | <b>0.00</b>     | -2185.607844              | <b>0</b>   | <b>0.00</b>       |
| Cpl AcO <sup>-</sup> * 3d                             | <b>CB</b>                                      | -1204.909312       |               | 0.304204             | 0.251221                              | -1206.033950             |               | -1205.729746                           |                 | -1205.782729              |            |                   |
| <b>CB + I<sup>+</sup></b>                             |                                                | -2184.013831       | <b>-19.54</b> | 0.671586             | 0.569818                              | -2186.210871             | <b>-26.05</b> | -2185.539284                           | <b>-23.16</b>   | -2185.641052              | <b>0</b>   | <b>-20.84</b>     |
| NaBF <sub>4</sub>                                     |                                                | -586.311112        |               | 0.015738             | 0.014928                              | -586.880016              |               | -586.864278                            |                 | -586.894944               |            |                   |

|                                              |               |              |               |          |          |              |               |              |               |              |          |               |
|----------------------------------------------|---------------|--------------|---------------|----------|----------|--------------|---------------|--------------|---------------|--------------|----------|---------------|
| <b>CB + I<sup>+</sup> + NaBF<sub>4</sub></b> |               | -2770.324943 | <b>0.00</b>   | 0.687324 | 0.554890 | -2773.090887 | <b>0.00</b>   | -2772.403562 | <b>0.00</b>   | -2772.535996 | <b>0</b> | <b>0.00</b>   |
| <i>anti</i> -MeO, <i>anti</i> (MeO)-         |               |              |               |          |          |              |               |              |               |              |          |               |
| BF <sub>4</sub>                              | <b>C(a,a)</b> | -1403.282845 |               | 0.383563 | 0.325957 | -1404.876211 |               | -1404.492648 |               | -1404.550254 |          |               |
| AcONa                                        |               | -390.512843  |               | 0.050765 | 0.019824 | -390.838719  |               | -390.787953  |               | -390.818894  |          |               |
| <b>3d + AcONa + C(a,a)</b>                   |               | -2770.365010 | <b>-25.14</b> | 0.688044 | 0.556550 | -2773.129058 | <b>-23.95</b> | -2772.441013 | <b>-23.50</b> | -2772.572507 | <b>1</b> | <b>-21.02</b> |

<sup>a</sup> M06-2X/def2-SVP; <sup>b</sup> M06-2X/def2-TZVP; <sup>c</sup> M06-2X/def2-TZVP energies combined with thermal corrections M06-2X/def2-SVP.

**Table S-1d'**. Calculated absolute and relative (in kcal mol<sup>-1</sup>) energies of whole reaction in CH<sub>2</sub>Cl<sub>2</sub>.

| <b>Table S-2d'</b>                               |           | E /au <sup>a</sup> | $\Delta E^a$  | ZPE /au <sup>a</sup> | $\delta G^{298K}$<br>/au <sup>a</sup> | E TZ(D)/ au <sup>b</sup> | $\Delta E^b$  | E <sup>0K</sup> TZ(D)/ au <sup>c</sup> | $\Delta E^{0K}$ | G TZ(D) / au <sup>c</sup> | $\Delta n$ | $\Delta G^{298K}$ |
|--------------------------------------------------|-----------|--------------------|---------------|----------------------|---------------------------------------|--------------------------|---------------|----------------------------------------|-----------------|---------------------------|------------|-------------------|
| 1-Pentene                                        | <b>1x</b> | -196.279205        |               | 0.136924             | 0.106958                              | -196.504400              |               | -196.367475                            |                 | -196.397441               |            |                   |
| C <sub>6</sub> H <sub>5</sub> SO <sub>2</sub> Na | <b>2a</b> | -941.962390        |               | 0.100536             | 0.064634                              | -942.621206              |               | -942.520671                            |                 | -942.556573               |            |                   |
| AcOH                                             |           | -228.823833        |               | 0.062241             | 0.035207                              | -229.097734              |               | -229.035493                            |                 | -229.062527               |            |                   |
| <b>1x + 2a + AcOH</b>                            |           | -1367.065428       | <b>0.00</b>   | 0.299701             | 0.206799                              | -1368.223340             | <b>0.00</b>   | -1367.923639                           | <b>0.00</b>     | -1368.016541              | <b>0</b>   | <b>0.00</b>       |
| Product                                          | <b>3d</b> | -976.569322        |               | 0.253716             | 0.210769                              | -977.414128              |               | -977.160412                            |                 | -977.203359               |            |                   |
| AcONa                                            |           | -390.512843        |               | 0.050765             | 0.019824                              | -390.838719              |               | -390.787953                            |                 | -390.818894               |            |                   |
| <b>3d + AcONa</b>                                |           | -1367.082165       | <b>-10.50</b> | 0.304481             | 0.230593                              | -1368.252847             | <b>-18.52</b> | -1367.948366                           | <b>-15.52</b>   | -1368.022254              | <b>1</b>   | <b>-1.69</b>      |

<sup>a</sup> M06-2X/def2-SVP; <sup>b</sup> M06-2X/def2-TZVP; <sup>c</sup> M06-2X/def2-TZVP energies combined with thermal corrections M06-2X/def2-SVP.

**Table S-2d''**. Calculated absolute and relative (in kcal mol<sup>-1</sup>) energies of whole reaction in in water.

| <b>Table S-2d''</b>                              |           | E /au <sup>a</sup> | $\Delta E^a$  | ZPE /au <sup>a</sup> | $\delta G^{298K}$<br>/au <sup>a</sup> | E TZ(D)/ au <sup>b</sup> | $\Delta E^b$  | E <sup>0K</sup> TZ(D)/ au <sup>c</sup> | $\Delta E^{0K}$ | G TZ(D) / au <sup>c</sup> | $\Delta n$ | $\Delta G^{298K}$ |
|--------------------------------------------------|-----------|--------------------|---------------|----------------------|---------------------------------------|--------------------------|---------------|----------------------------------------|-----------------|---------------------------|------------|-------------------|
| 1-Pentene                                        | <b>1x</b> | -196.270649        |               | 0.136923             | 0.106936                              | -196.496021              |               | -196.359098                            |                 | -196.389085               |            |                   |
| C <sub>6</sub> H <sub>5</sub> SO <sub>2</sub> Na | <b>2a</b> | -941.968281        |               | 0.100548             | 0.064822                              | -942.625426              |               | -942.524878                            |                 | -942.560604               |            |                   |
| AcOH                                             |           | -228.825051        |               | 0.061963             | 0.034903                              | -229.098744              |               | -229.036781                            |                 | -229.063841               |            |                   |
| <b>1x + 2a + AcOH</b>                            |           | -1367.063981       | <b>0.00</b>   | 0.299434             | 0.206661                              | -1368.220191             | <b>0.00</b>   | -1367.920757                           | <b>0.00</b>     | -1368.013530              | <b>0</b>   | <b>0.00</b>       |
| Product                                          | <b>3d</b> | -976.564264        |               | 0.253612             | 0.210521                              | -977.407710              |               | -977.154098                            |                 | -977.197189               |            |                   |
| AcONa                                            |           | -390.523303        |               | 0.050543             | 0.019468                              | -390.848380              |               | -390.797837                            |                 | -390.828912               |            |                   |
| <b>3d + AcONa</b>                                |           | -1367.087567       | <b>-14.80</b> | 0.304155             | 0.229989                              | -1368.256090             | <b>-22.53</b> | -1367.951935                           | <b>-19.56</b>   | -1368.026101              | <b>1</b>   | <b>-5.99</b>      |

<sup>a</sup> M06-2X/def2-SVP; <sup>b</sup> M06-2X/def2-TZVP; <sup>c</sup> M06-2X/def2-TZVP energies combined with thermal corrections M06-2X/def2-SVP.

**Pictures and Cartesian coordinates of optimized structures M06-2X/def2-TZVP.**

*anti-I*<sup>+</sup> (Table S-1a)

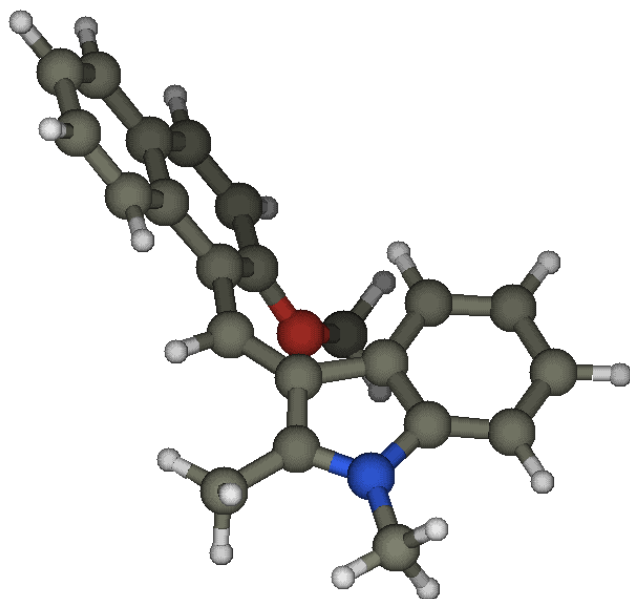


---

|    |   |   |           |           |           |
|----|---|---|-----------|-----------|-----------|
| 1  | 7 | 0 | 0.006505  | -0.007916 | 0.019078  |
| 2  | 6 | 0 | -0.003622 | 0.022015  | 1.332708  |
| 3  | 6 | 0 | 1.367010  | 0.022168  | 1.815601  |
| 4  | 6 | 0 | 2.204071  | -0.043221 | 0.618947  |
| 5  | 6 | 0 | 1.330629  | -0.065602 | -0.469578 |
| 6  | 6 | 0 | 1.741571  | -0.160042 | -1.784220 |
| 7  | 6 | 0 | 3.111230  | -0.251286 | -2.001260 |
| 8  | 6 | 0 | 4.006910  | -0.262852 | -0.933118 |
| 9  | 6 | 0 | 3.568160  | -0.160344 | 0.381709  |
| 10 | 6 | 0 | -1.259506 | 0.082841  | 2.113164  |
| 11 | 1 | 0 | -1.809918 | 0.991047  | 1.858008  |
| 12 | 1 | 0 | -1.892819 | -0.772193 | 1.869673  |
| 13 | 1 | 0 | -1.066383 | 0.089192  | 3.180778  |
| 14 | 6 | 0 | -1.142555 | 0.007204  | -0.869116 |
| 15 | 1 | 0 | 1.036483  | -0.171088 | -2.604769 |
| 16 | 1 | 0 | 3.484730  | -0.326118 | -3.014053 |
| 17 | 1 | 0 | 5.066927  | -0.354002 | -1.131736 |
| 18 | 1 | 0 | 4.280697  | -0.186580 | 1.194186  |
| 19 | 6 | 0 | 1.662227  | -0.007294 | 3.142278  |
| 20 | 6 | 0 | 2.939769  | 0.126696  | 3.799903  |
| 21 | 1 | 0 | 0.826027  | -0.170472 | 3.814421  |
| 22 | 6 | 0 | 3.856622  | 1.105902  | 3.410983  |
| 23 | 6 | 0 | 5.057292  | 1.298846  | 4.135374  |
| 24 | 6 | 0 | 5.318278  | 0.539719  | 5.236838  |
| 25 | 6 | 0 | 4.412654  | -0.450403 | 5.689975  |
| 26 | 6 | 0 | 3.210417  | -0.660541 | 4.971332  |
| 27 | 8 | 0 | 3.519106  | 1.888049  | 2.380194  |
| 28 | 1 | 0 | 5.757740  | 2.060475  | 3.826326  |
| 29 | 6 | 0 | 4.697371  | -1.228526 | 6.835012  |
| 30 | 6 | 0 | 2.339125  | -1.681935 | 5.418600  |
| 31 | 1 | 0 | 6.236447  | 0.695169  | 5.791282  |
| 32 | 6 | 0 | 3.822142  | -2.189852 | 7.260433  |
| 33 | 1 | 0 | 5.625152  | -1.046853 | 7.364642  |
| 34 | 1 | 0 | 4.042051  | -2.783488 | 8.138107  |
| 35 | 6 | 0 | 2.633825  | -2.415429 | 6.538808  |
| 36 | 1 | 0 | 1.437971  | -1.908142 | 4.863869  |

|    |   |   |           |           |           |
|----|---|---|-----------|-----------|-----------|
| 37 | 1 | 0 | 1.949399  | -3.187948 | 6.866220  |
| 38 | 1 | 0 | -1.138335 | -0.901293 | -1.470107 |
| 39 | 1 | 0 | -2.055752 | 0.057515  | -0.286534 |
| 40 | 1 | 0 | -1.072783 | 0.875459  | -1.523136 |
| 41 | 6 | 0 | 4.467995  | 2.811917  | 1.859539  |
| 42 | 1 | 0 | 4.000451  | 3.246159  | 0.979642  |
| 43 | 1 | 0 | 4.686069  | 3.598591  | 2.583547  |
| 44 | 1 | 0 | 5.389991  | 2.303763  | 1.570957  |

*syn-I*<sup>+</sup> (Table S-1a)

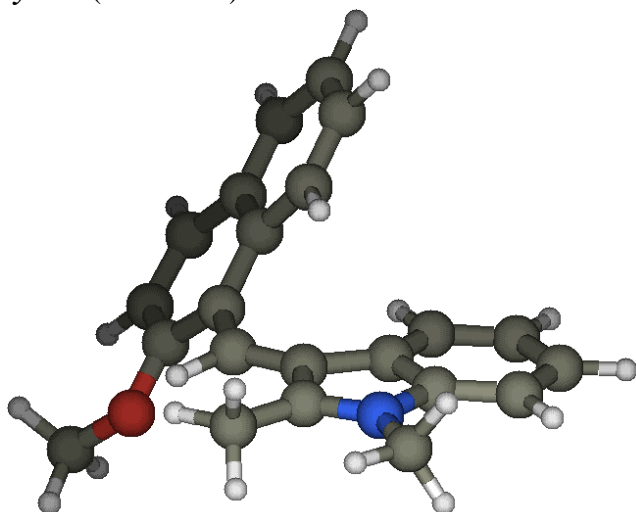

|    |   |   |           |           |           |
|----|---|---|-----------|-----------|-----------|
| 1  | 7 | 0 | 0.007964  | -0.002135 | 0.013316  |
| 2  | 6 | 0 | -0.000183 | -0.033502 | 1.326476  |
| 3  | 6 | 0 | 1.371480  | -0.017823 | 1.807298  |
| 4  | 6 | 0 | 2.206865  | 0.062037  | 0.608252  |
| 5  | 6 | 0 | 1.329876  | 0.073484  | -0.478334 |
| 6  | 6 | 0 | 1.735874  | 0.179968  | -1.793090 |
| 7  | 6 | 0 | 3.103898  | 0.291561  | -2.013039 |
| 8  | 6 | 0 | 4.002003  | 0.310306  | -0.947919 |
| 9  | 6 | 0 | 3.568802  | 0.199113  | 0.368604  |
| 10 | 6 | 0 | -1.252704 | -0.110519 | 2.110358  |
| 11 | 1 | 0 | -1.904476 | 0.727330  | 1.856578  |
| 12 | 1 | 0 | -1.784204 | -1.033770 | 1.869106  |
| 13 | 1 | 0 | -1.056415 | -0.096930 | 3.177315  |
| 14 | 6 | 0 | -1.142470 | -0.028439 | -0.873148 |
| 15 | 1 | 0 | 1.028610  | 0.186311  | -2.611770 |
| 16 | 1 | 0 | 3.473523  | 0.376484  | -3.026445 |
| 17 | 1 | 0 | 5.060298  | 0.414841  | -1.148434 |
| 18 | 1 | 0 | 4.283394  | 0.228013  | 1.178370  |
| 19 | 6 | 0 | 1.670716  | 0.005613  | 3.132632  |
| 20 | 6 | 0 | 2.958593  | -0.101878 | 3.779441  |
| 21 | 1 | 0 | 0.841115  | 0.172699  | 3.811486  |
| 22 | 6 | 0 | 3.184322  | 0.763072  | 4.853577  |
| 23 | 6 | 0 | 4.410604  | 0.752423  | 5.552706  |
| 24 | 6 | 0 | 5.382008  | -0.134435 | 5.189534  |
| 25 | 6 | 0 | 5.182592  | -1.076000 | 4.152525  |
| 26 | 6 | 0 | 3.952363  | -1.080704 | 3.445299  |
| 27 | 8 | 0 | 2.199486  | 1.629100  | 5.136381  |
| 28 | 1 | 0 | 4.587107  | 1.449985  | 6.358052  |
| 29 | 6 | 0 | 6.180535  | -2.030338 | 3.842777  |
| 30 | 6 | 0 | 3.743170  | -2.106616 | 2.492322  |
| 31 | 1 | 0 | 6.330102  | -0.136902 | 5.714487  |



|    |   |   |           |           |           |
|----|---|---|-----------|-----------|-----------|
| 32 | 6 | 0 | 5.963207  | -2.983169 | 2.887466  |
| 33 | 1 | 0 | 7.113993  | -1.995861 | 4.392128  |
| 34 | 1 | 0 | 6.726883  | -3.713754 | 2.655035  |
| 35 | 6 | 0 | 4.721813  | -3.025898 | 2.221187  |
| 36 | 1 | 0 | 2.795277  | -2.178213 | 1.978440  |
| 37 | 1 | 0 | 4.535282  | -3.802023 | 1.489507  |
| 38 | 1 | 0 | -1.056402 | -0.887327 | -1.537410 |
| 39 | 1 | 0 | -2.053393 | -0.103851 | -0.289759 |
| 40 | 1 | 0 | -1.156009 | 0.887109  | -1.463282 |
| 41 | 6 | 0 | 2.344915  | 2.503771  | 6.250502  |
| 42 | 1 | 0 | 1.413699  | 3.060120  | 6.310990  |
| 43 | 1 | 0 | 2.496763  | 1.940976  | 7.172823  |
| 44 | 1 | 0 | 3.173669  | 3.195293  | 6.092359  |

---

**Ion couple  $\Gamma^+ \text{BF}_4^- (a,a)$  (Table S-1b)**

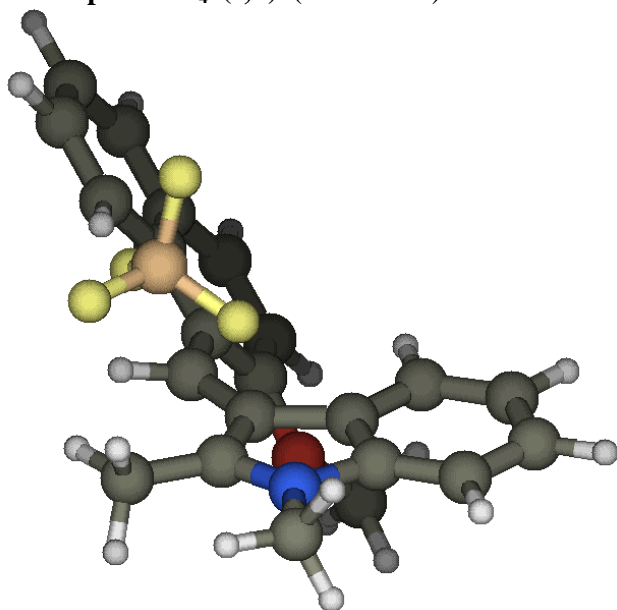


---

|    |   |   |           |           |           |
|----|---|---|-----------|-----------|-----------|
| 1  | 7 | 0 | 0.033023  | -0.029907 | 0.006067  |
| 2  | 6 | 0 | 0.012790  | -0.013926 | 1.317735  |
| 3  | 6 | 0 | 1.382009  | -0.011238 | 1.810513  |
| 4  | 6 | 0 | 2.228003  | -0.050758 | 0.618552  |
| 5  | 6 | 0 | 1.360131  | -0.073066 | -0.474776 |
| 6  | 6 | 0 | 1.780095  | -0.153103 | -1.787133 |
| 7  | 6 | 0 | 3.152308  | -0.224935 | -1.998068 |
| 8  | 6 | 0 | 4.042134  | -0.232027 | -0.925773 |
| 9  | 6 | 0 | 3.594146  | -0.147287 | 0.387768  |
| 10 | 6 | 0 | -1.246216 | 0.045706  | 2.091076  |
| 11 | 1 | 0 | -1.774585 | 0.972496  | 1.854303  |
| 12 | 1 | 0 | -1.890465 | -0.792296 | 1.822567  |
| 13 | 1 | 0 | -1.059797 | 0.016288  | 3.159153  |
| 14 | 6 | 0 | -1.110362 | -0.068768 | -0.886325 |
| 15 | 1 | 0 | 1.079363  | -0.170592 | -2.611274 |
| 16 | 1 | 0 | 3.531468  | -0.289495 | -3.009542 |
| 17 | 1 | 0 | 5.104354  | -0.308878 | -1.118848 |
| 18 | 1 | 0 | 4.302038  | -0.174178 | 1.203892  |
| 19 | 6 | 0 | 1.664622  | -0.093247 | 3.133689  |
| 20 | 6 | 0 | 2.944004  | -0.006727 | 3.804202  |
| 21 | 1 | 0 | 0.820933  | -0.276652 | 3.790513  |
| 22 | 6 | 0 | 3.867756  | 0.985756  | 3.480506  |
| 23 | 6 | 0 | 5.067566  | 1.122620  | 4.218851  |

|    |   |   |           |           |           |
|----|---|---|-----------|-----------|-----------|
| 24 | 6 | 0 | 5.319469  | 0.293778  | 5.271853  |
| 25 | 6 | 0 | 4.405095  | -0.715784 | 5.656988  |
| 26 | 6 | 0 | 3.205159  | -0.870628 | 4.920071  |
| 27 | 8 | 0 | 3.541527  | 1.833897  | 2.494770  |
| 28 | 1 | 0 | 5.775979  | 1.895312  | 3.959980  |
| 29 | 6 | 0 | 4.676541  | -1.569881 | 6.750865  |
| 30 | 6 | 0 | 2.322631  | -1.914157 | 5.291173  |
| 31 | 1 | 0 | 6.237095  | 0.406550  | 5.837475  |
| 32 | 6 | 0 | 3.792289  | -2.551388 | 7.104545  |
| 33 | 1 | 0 | 5.601955  | -1.430769 | 7.297547  |
| 34 | 1 | 0 | 4.002525  | -3.204176 | 7.941834  |
| 35 | 6 | 0 | 2.607176  | -2.722200 | 6.360937  |
| 36 | 1 | 0 | 1.426154  | -2.098770 | 4.713278  |
| 37 | 1 | 0 | 1.917717  | -3.512961 | 6.628837  |
| 38 | 1 | 0 | -1.068303 | -0.987292 | -1.470366 |
| 39 | 1 | 0 | -2.027595 | -0.047183 | -0.308350 |
| 40 | 1 | 0 | -1.072236 | 0.791792  | -1.553416 |
| 41 | 6 | 0 | 4.504536  | 2.773205  | 2.035421  |
| 42 | 1 | 0 | 4.047895  | 3.267778  | 1.181881  |
| 43 | 1 | 0 | 4.731512  | 3.511709  | 2.806332  |
| 44 | 1 | 0 | 5.421365  | 2.271784  | 1.718820  |
| 45 | 9 | 0 | -0.195438 | -2.673820 | 2.963114  |
| 46 | 5 | 0 | -0.888453 | -3.373287 | 1.963906  |
| 47 | 9 | 0 | -0.492853 | -4.710030 | 1.965529  |
| 48 | 9 | 0 | -2.263996 | -3.283381 | 2.206454  |
| 49 | 9 | 0 | -0.602895 | -2.797551 | 0.716454  |

Ion couple  $\text{I}^+ \text{BF}_4^-$  ( $a,s$ ) (Table S-1b)

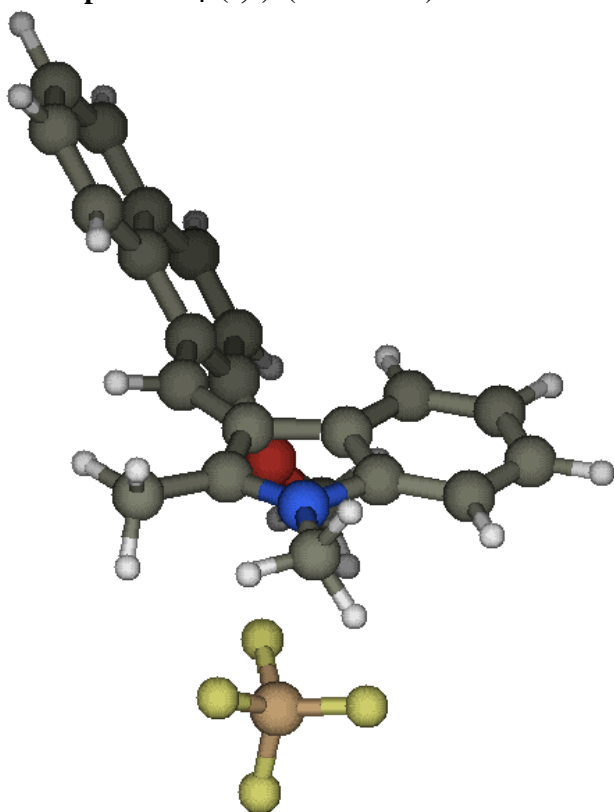

|   |   |   |          |           |          |
|---|---|---|----------|-----------|----------|
| 1 | 7 | 0 | 0.021390 | -0.028410 | 0.046739 |
| 2 | 6 | 0 | 0.013417 | 0.041897  | 1.355447 |
| 3 | 6 | 0 | 1.389377 | 0.083943  | 1.837034 |

|    |   |   |           |           |           |
|----|---|---|-----------|-----------|-----------|
| 4  | 6 | 0 | 2.223772  | 0.025875  | 0.637011  |
| 5  | 6 | 0 | 1.346624  | -0.047200 | -0.445679 |
| 6  | 6 | 0 | 1.754623  | -0.145234 | -1.759858 |
| 7  | 6 | 0 | 3.125976  | -0.185888 | -1.983887 |
| 8  | 6 | 0 | 4.026428  | -0.144998 | -0.921630 |
| 9  | 6 | 0 | 3.589683  | -0.038969 | 0.394283  |
| 10 | 6 | 0 | -1.238752 | 0.090303  | 2.140231  |
| 11 | 1 | 0 | -1.790220 | 0.993445  | 1.868908  |
| 12 | 1 | 0 | -1.864002 | -0.773399 | 1.907543  |
| 13 | 1 | 0 | -1.042352 | 0.111330  | 3.207089  |
| 14 | 6 | 0 | -1.128566 | -0.124754 | -0.836908 |
| 15 | 1 | 0 | 1.046135  | -0.185773 | -2.576394 |
| 16 | 1 | 0 | 3.496441  | -0.256323 | -2.998164 |
| 17 | 1 | 0 | 5.088505  | -0.193096 | -1.124516 |
| 18 | 1 | 0 | 4.307609  | -0.019984 | 1.201656  |
| 19 | 6 | 0 | 1.689455  | 0.058952  | 3.157485  |
| 20 | 6 | 0 | 2.984382  | 0.168699  | 3.801002  |
| 21 | 1 | 0 | 0.858028  | -0.085597 | 3.839432  |
| 22 | 6 | 0 | 3.886558  | 1.167660  | 3.440078  |
| 23 | 6 | 0 | 5.110531  | 1.320760  | 4.135762  |
| 24 | 6 | 0 | 5.405245  | 0.502910  | 5.185716  |
| 25 | 6 | 0 | 4.510368  | -0.507969 | 5.612178  |
| 26 | 6 | 0 | 3.285821  | -0.676917 | 4.919010  |
| 27 | 8 | 0 | 3.517922  | 1.997232  | 2.458259  |
| 28 | 1 | 0 | 5.803164  | 2.096056  | 3.843143  |
| 29 | 6 | 0 | 4.823658  | -1.347382 | 6.706222  |
| 30 | 6 | 0 | 2.419915  | -1.715217 | 5.341851  |
| 31 | 1 | 0 | 6.341129  | 0.626181  | 5.718166  |
| 32 | 6 | 0 | 3.956504  | -2.326152 | 7.106591  |
| 33 | 1 | 0 | 5.767328  | -1.197273 | 7.217681  |
| 34 | 1 | 0 | 4.198892  | -2.965694 | 7.945317  |
| 35 | 6 | 0 | 2.743802  | -2.507695 | 6.411660  |
| 36 | 1 | 0 | 1.497458  | -1.901753 | 4.807583  |
| 37 | 1 | 0 | 2.063843  | -3.291595 | 6.721018  |
| 38 | 1 | 0 | -1.123326 | -1.106361 | -1.311237 |
| 39 | 1 | 0 | -2.040465 | 0.010932  | -0.266837 |
| 40 | 1 | 0 | -1.054202 | 0.654917  | -1.591490 |
| 41 | 6 | 0 | 4.427391  | 2.982743  | 1.988233  |
| 42 | 1 | 0 | 3.923599  | 3.471476  | 1.158694  |
| 43 | 1 | 0 | 4.645900  | 3.715763  | 2.766854  |
| 44 | 1 | 0 | 5.354049  | 2.525338  | 1.635709  |
| 45 | 9 | 0 | 0.626485  | 2.942727  | 0.696028  |
| 46 | 5 | 0 | -0.377951 | 3.275659  | -0.217799 |
| 47 | 9 | 0 | -0.558432 | 4.659466  | -0.238453 |
| 48 | 9 | 0 | -0.015027 | 2.827859  | -1.494771 |
| 49 | 9 | 0 | -1.576821 | 2.652935  | 0.165585  |

-----

**Ion couple  $I^+ BF_4^-$  (*s,a*) (Table S-1b)**

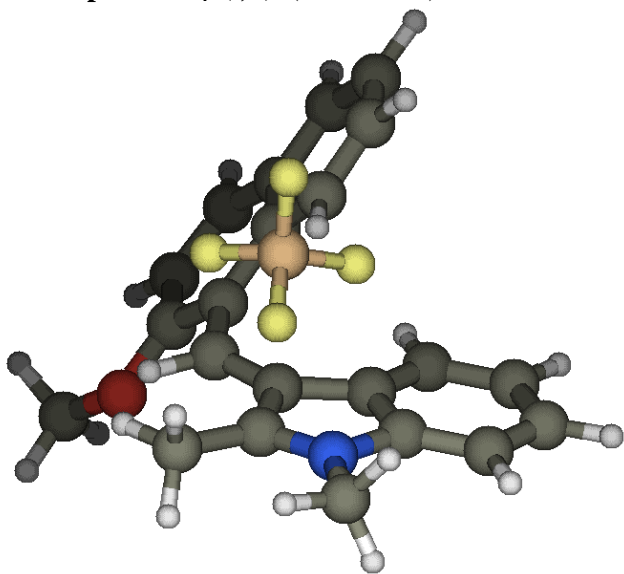


---

|    |   |   |           |           |           |
|----|---|---|-----------|-----------|-----------|
| 1  | 7 | 0 | 0.002578  | 0.025703  | 0.017178  |
| 2  | 6 | 0 | 0.011487  | -0.000095 | 1.327645  |
| 3  | 6 | 0 | 1.394018  | -0.034312 | 1.787344  |
| 4  | 6 | 0 | 2.212482  | 0.019897  | 0.574842  |
| 5  | 6 | 0 | 1.318796  | 0.056851  | -0.496101 |
| 6  | 6 | 0 | 1.706759  | 0.129898  | -1.817245 |
| 7  | 6 | 0 | 3.075259  | 0.182804  | -2.061055 |
| 8  | 6 | 0 | 3.990710  | 0.172587  | -1.011900 |
| 9  | 6 | 0 | 3.573810  | 0.091476  | 0.313067  |
| 10 | 6 | 0 | -1.230432 | -0.003035 | 2.130513  |
| 11 | 1 | 0 | -1.824660 | 0.881019  | 1.890100  |
| 12 | 1 | 0 | -1.818065 | -0.889700 | 1.888185  |
| 13 | 1 | 0 | -1.017535 | -0.009510 | 3.194259  |
| 14 | 6 | 0 | -1.159286 | 0.016145  | -0.852959 |
| 15 | 1 | 0 | 0.987166  | 0.147614  | -2.624853 |
| 16 | 1 | 0 | 3.430823  | 0.238283  | -3.081588 |
| 17 | 1 | 0 | 5.049340  | 0.225350  | -1.230454 |
| 18 | 1 | 0 | 4.301769  | 0.087462  | 1.111677  |
| 19 | 6 | 0 | 1.717916  | -0.074714 | 3.100570  |
| 20 | 6 | 0 | 3.027719  | -0.262503 | 3.698100  |
| 21 | 1 | 0 | 0.912273  | 0.076840  | 3.811153  |
| 22 | 6 | 0 | 3.362015  | 0.581593  | 4.753904  |
| 23 | 6 | 0 | 4.613784  | 0.479553  | 5.398523  |
| 24 | 6 | 0 | 5.500446  | -0.478294 | 4.997548  |
| 25 | 6 | 0 | 5.185962  | -1.399368 | 3.971719  |
| 26 | 6 | 0 | 3.928146  | -1.309143 | 3.320429  |
| 27 | 8 | 0 | 2.452153  | 1.518336  | 5.078740  |
| 28 | 1 | 0 | 4.875180  | 1.160815  | 6.194611  |
| 29 | 6 | 0 | 6.093647  | -2.425103 | 3.611621  |
| 30 | 6 | 0 | 3.596878  | -2.305407 | 2.368718  |
| 31 | 1 | 0 | 6.466876  | -0.552485 | 5.482361  |
| 32 | 6 | 0 | 5.760960  | -3.349021 | 2.661676  |
| 33 | 1 | 0 | 7.051160  | -2.466457 | 4.117685  |
| 34 | 1 | 0 | 6.455310  | -4.134108 | 2.391520  |
| 35 | 6 | 0 | 4.490877  | -3.291515 | 2.049049  |
| 36 | 1 | 0 | 2.623432  | -2.301932 | 1.897513  |
| 37 | 1 | 0 | 4.212079  | -4.043396 | 1.321141  |
| 38 | 1 | 0 | -1.076798 | -0.830095 | -1.532933 |
| 39 | 1 | 0 | -2.061206 | -0.081564 | -0.259391 |

|    |   |   |           |           |           |
|----|---|---|-----------|-----------|-----------|
| 40 | 1 | 0 | -1.184047 | 0.945297  | -1.422098 |
| 41 | 6 | 0 | 2.694940  | 2.350295  | 6.206314  |
| 42 | 1 | 0 | 1.808288  | 2.969590  | 6.312187  |
| 43 | 1 | 0 | 2.834987  | 1.754802  | 7.110240  |
| 44 | 1 | 0 | 3.565423  | 2.987237  | 6.040502  |
| 45 | 9 | 0 | 0.943632  | -2.850911 | 0.307736  |
| 46 | 5 | 0 | -0.176668 | -3.303301 | 1.017625  |
| 47 | 9 | 0 | -0.239386 | -4.695122 | 0.962939  |
| 48 | 9 | 0 | -0.081003 | -2.885052 | 2.351189  |
| 49 | 9 | 0 | -1.334428 | -2.755673 | 0.444316  |

-----

**Ion couple  $\text{I}^+ \text{BF}_4^-$  (s,s) (Table S-1b)**

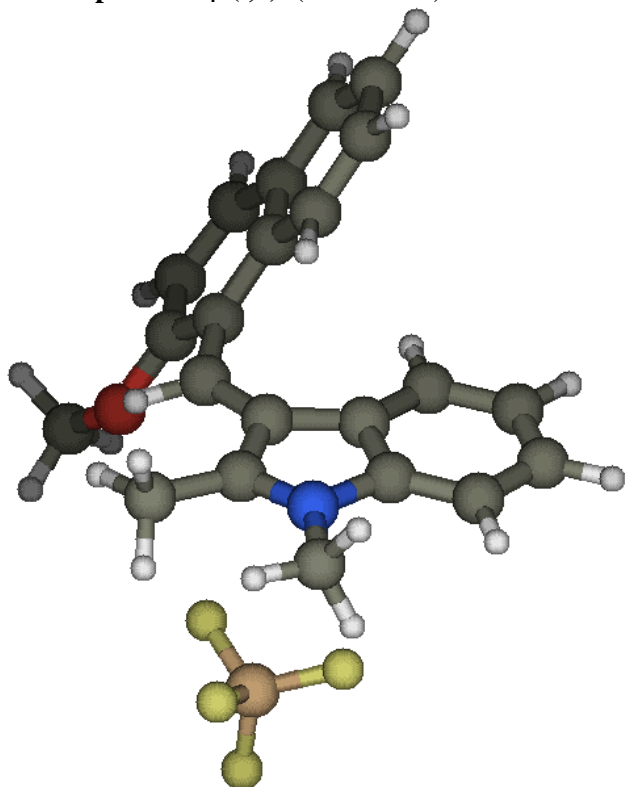

|    |   |   |           |           |           |
|----|---|---|-----------|-----------|-----------|
| 1  | 7 | 0 | 0.041033  | -0.004689 | -0.039753 |
| 2  | 6 | 0 | 0.028206  | -0.019207 | 1.270337  |
| 3  | 6 | 0 | 1.404054  | -0.021488 | 1.756109  |
| 4  | 6 | 0 | 2.242338  | 0.036205  | 0.556933  |
| 5  | 6 | 0 | 1.366462  | 0.049787  | -0.529300 |
| 6  | 6 | 0 | 1.774495  | 0.143427  | -1.843225 |
| 7  | 6 | 0 | 3.144432  | 0.235357  | -2.063571 |
| 8  | 6 | 0 | 4.042225  | 0.247524  | -0.998895 |
| 9  | 6 | 0 | 3.605698  | 0.151983  | 0.318227  |
| 10 | 6 | 0 | -1.221571 | -0.076526 | 2.057756  |
| 11 | 1 | 0 | -1.920441 | 0.677891  | 1.698050  |
| 12 | 1 | 0 | -1.681617 | -1.061345 | 1.942046  |
| 13 | 1 | 0 | -1.032134 | 0.094462  | 3.112476  |
| 14 | 6 | 0 | -1.100799 | -0.030863 | -0.937034 |
| 15 | 1 | 0 | 1.067182  | 0.162464  | -2.661541 |
| 16 | 1 | 0 | 3.514761  | 0.313322  | -3.077367 |
| 17 | 1 | 0 | 5.101889  | 0.338631  | -1.199001 |
| 18 | 1 | 0 | 4.319136  | 0.179998  | 1.129027  |
| 19 | 6 | 0 | 1.700075  | 0.010347  | 3.075996  |
| 20 | 6 | 0 | 2.998442  | -0.075904 | 3.719552  |

|    |   |   |           |           |           |
|----|---|---|-----------|-----------|-----------|
| 21 | 1 | 0 | 0.871084  | 0.172851  | 3.756566  |
| 22 | 6 | 0 | 3.239980  | 0.837500  | 4.744831  |
| 23 | 6 | 0 | 4.472706  | 0.850645  | 5.433664  |
| 24 | 6 | 0 | 5.434295  | -0.061189 | 5.107706  |
| 25 | 6 | 0 | 5.218633  | -1.046557 | 4.116297  |
| 26 | 6 | 0 | 3.981598  | -1.071984 | 3.420121  |
| 27 | 8 | 0 | 2.260023  | 1.720512  | 4.995633  |
| 28 | 1 | 0 | 4.659974  | 1.584441  | 6.203694  |
| 29 | 6 | 0 | 6.208074  | -2.019047 | 3.833674  |
| 30 | 6 | 0 | 3.761217  | -2.128292 | 2.501286  |
| 31 | 1 | 0 | 6.386526  | -0.046770 | 5.624928  |
| 32 | 6 | 0 | 5.978171  | -3.003798 | 2.914940  |
| 33 | 1 | 0 | 7.147051  | -1.969284 | 4.372630  |
| 34 | 1 | 0 | 6.736239  | -3.746546 | 2.703119  |
| 35 | 6 | 0 | 4.732236  | -3.061492 | 2.255810  |
| 36 | 1 | 0 | 2.810704  | -2.205675 | 1.992368  |
| 37 | 1 | 0 | 4.538491  | -3.859369 | 1.549761  |
| 38 | 1 | 0 | -1.013165 | -0.902794 | -1.584670 |
| 39 | 1 | 0 | -2.018571 | -0.086377 | -0.362934 |
| 40 | 1 | 0 | -1.096234 | 0.878855  | -1.534819 |
| 41 | 6 | 0 | 2.426488  | 2.658668  | 6.051517  |
| 42 | 1 | 0 | 1.501487  | 3.227477  | 6.087904  |
| 43 | 1 | 0 | 2.584002  | 2.151706  | 7.005193  |
| 44 | 1 | 0 | 3.259624  | 3.331797  | 5.843393  |
| 45 | 9 | 0 | -0.144372 | 2.796842  | 1.756438  |
| 46 | 5 | 0 | -0.696654 | 3.245200  | 0.549014  |
| 47 | 9 | 0 | -0.883685 | 4.626257  | 0.601337  |
| 48 | 9 | 0 | 0.164271  | 2.922618  | -0.506298 |
| 49 | 9 | 0 | -1.932081 | 2.610355  | 0.346891  |

---

**Ion couple  $I^+ BF_4^-$  (*a,p*) (Table S-1b)**

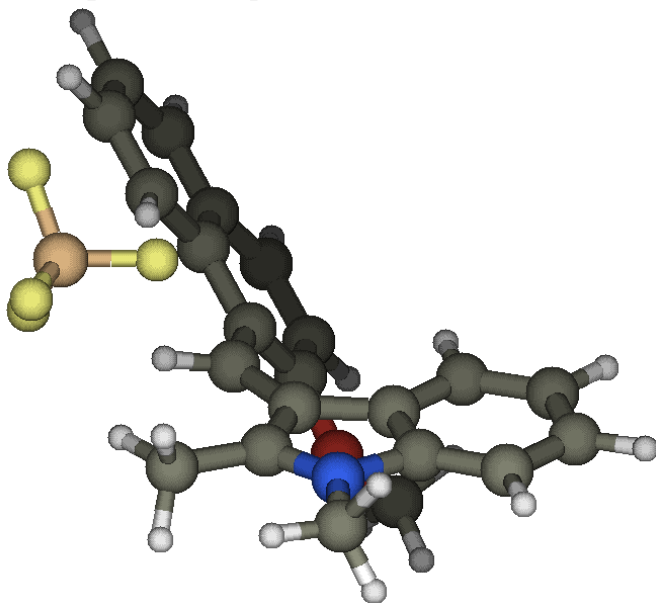


---

|   |   |   |           |           |           |
|---|---|---|-----------|-----------|-----------|
| 1 | 7 | 0 | 0.011711  | 0.013182  | 0.045601  |
| 2 | 6 | 0 | -0.003226 | 0.045747  | 1.360200  |
| 3 | 6 | 0 | 1.365691  | 0.034610  | 1.846923  |
| 4 | 6 | 0 | 2.206995  | -0.025747 | 0.652534  |
| 5 | 6 | 0 | 1.336483  | -0.048398 | -0.438652 |
| 6 | 6 | 0 | 1.751535  | -0.142517 | -1.752127 |
| 7 | 6 | 0 | 3.121835  | -0.231208 | -1.966352 |

|    |   |   |           |           |           |
|----|---|---|-----------|-----------|-----------|
| 8  | 6 | 0 | 4.014598  | -0.240265 | -0.895844 |
| 9  | 6 | 0 | 3.571742  | -0.139479 | 0.417895  |
| 10 | 6 | 0 | -1.259135 | 0.140506  | 2.134955  |
| 11 | 1 | 0 | -1.781211 | 1.063121  | 1.869666  |
| 12 | 1 | 0 | -1.912498 | -0.699497 | 1.894626  |
| 13 | 1 | 0 | -1.069728 | 0.140629  | 3.202692  |
| 14 | 6 | 0 | -1.134035 | 0.035525  | -0.846110 |
| 15 | 1 | 0 | 1.048117  | -0.156017 | -2.574093 |
| 16 | 1 | 0 | 3.497800  | -0.306080 | -2.978296 |
| 17 | 1 | 0 | 5.075447  | -0.329098 | -1.091355 |
| 18 | 1 | 0 | 4.282240  | -0.164628 | 1.232126  |
| 19 | 6 | 0 | 1.657998  | -0.026810 | 3.172427  |
| 20 | 6 | 0 | 2.945824  | 0.086087  | 3.821109  |
| 21 | 1 | 0 | 0.821013  | -0.209292 | 3.840559  |
| 22 | 6 | 0 | 3.855531  | 1.079648  | 3.457823  |
| 23 | 6 | 0 | 5.064155  | 1.248735  | 4.174737  |
| 24 | 6 | 0 | 5.341629  | 0.449344  | 5.243984  |
| 25 | 6 | 0 | 4.445211  | -0.560493 | 5.668319  |
| 26 | 6 | 0 | 3.235376  | -0.745989 | 4.955233  |
| 27 | 8 | 0 | 3.507574  | 1.898427  | 2.455837  |
| 28 | 1 | 0 | 5.758961  | 2.023566  | 3.886454  |
| 29 | 6 | 0 | 4.743055  | -1.383943 | 6.778698  |
| 30 | 6 | 0 | 2.370929  | -1.787906 | 5.367046  |
| 31 | 1 | 0 | 6.266156  | 0.587319  | 5.792602  |
| 32 | 6 | 0 | 3.873857  | -2.363874 | 7.172408  |
| 33 | 1 | 0 | 5.675493  | -1.221382 | 7.306679  |
| 34 | 1 | 0 | 4.103066  | -2.991233 | 8.024073  |
| 35 | 6 | 0 | 2.678635  | -2.564846 | 6.453190  |
| 36 | 1 | 0 | 1.465899  | -1.991845 | 4.811068  |
| 37 | 1 | 0 | 1.996792  | -3.350484 | 6.753916  |
| 38 | 1 | 0 | -1.126940 | -0.867693 | -1.454994 |
| 39 | 1 | 0 | -2.049226 | 0.077567  | -0.266066 |
| 40 | 1 | 0 | -1.064525 | 0.910097  | -1.492015 |
| 41 | 6 | 0 | 4.453008  | 2.836694  | 1.959619  |
| 42 | 1 | 0 | 3.980047  | 3.301647  | 1.098300  |
| 43 | 1 | 0 | 4.678918  | 3.599298  | 2.707003  |
| 44 | 1 | 0 | 5.372447  | 2.338264  | 1.646033  |
| 45 | 9 | 0 | -2.545481 | -2.431178 | 4.030304  |
| 46 | 5 | 0 | -1.217162 | -2.415329 | 4.459692  |
| 47 | 9 | 0 | -0.979671 | -3.486632 | 5.321574  |
| 48 | 9 | 0 | -0.364775 | -2.511610 | 3.348316  |
| 49 | 9 | 0 | -0.957544 | -1.209390 | 5.131660  |

---

**Ion couple  $I^+ BF_4^-$  (*a,pl*) (Table S-1b)**

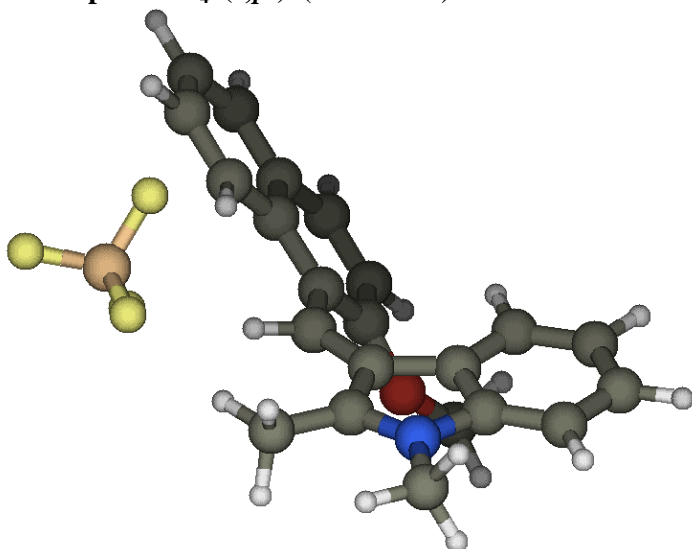


---

|    |   |   |           |           |           |
|----|---|---|-----------|-----------|-----------|
| 1  | 7 | 0 | 0.000000  | 0.000000  | 0.000000  |
| 2  | 6 | 0 | 0.000000  | 0.000000  | 1.314924  |
| 3  | 6 | 0 | 1.374207  | 0.000000  | 1.786540  |
| 4  | 6 | 0 | 2.202404  | -0.033266 | 0.581886  |
| 5  | 6 | 0 | 1.319973  | -0.037197 | -0.500039 |
| 6  | 6 | 0 | 1.721033  | -0.098377 | -1.819852 |
| 7  | 6 | 0 | 3.089399  | -0.174240 | -2.050877 |
| 8  | 6 | 0 | 3.993972  | -0.203524 | -0.990697 |
| 9  | 6 | 0 | 3.565112  | -0.134529 | 0.329681  |
| 10 | 6 | 0 | -1.247009 | 0.030399  | 2.108510  |
| 11 | 1 | 0 | -1.794773 | 0.952023  | 1.897589  |
| 12 | 1 | 0 | -1.885719 | -0.810245 | 1.832989  |
| 13 | 1 | 0 | -1.046957 | -0.019017 | 3.173525  |
| 14 | 6 | 0 | -1.156800 | 0.021681  | -0.877473 |
| 15 | 1 | 0 | 1.008843  | -0.097041 | -2.634390 |
| 16 | 1 | 0 | 3.454659  | -0.223512 | -3.068324 |
| 17 | 1 | 0 | 5.053028  | -0.282888 | -1.199669 |
| 18 | 1 | 0 | 4.284739  | -0.175197 | 1.135230  |
| 19 | 6 | 0 | 1.676773  | -0.055121 | 3.110896  |
| 20 | 6 | 0 | 2.965844  | 0.061681  | 3.753830  |
| 21 | 1 | 0 | 0.844882  | -0.233098 | 3.786705  |
| 22 | 6 | 0 | 3.880770  | 1.045636  | 3.376529  |
| 23 | 6 | 0 | 5.102740  | 1.200555  | 4.073069  |
| 24 | 6 | 0 | 5.387554  | 0.397559  | 5.137876  |
| 25 | 6 | 0 | 4.482575  | -0.595811 | 5.582381  |
| 26 | 6 | 0 | 3.256346  | -0.763954 | 4.893092  |
| 27 | 8 | 0 | 3.524770  | 1.868261  | 2.381102  |
| 28 | 1 | 0 | 5.802853  | 1.965815  | 3.772149  |
| 29 | 6 | 0 | 4.786599  | -1.416724 | 6.693097  |
| 30 | 6 | 0 | 2.376102  | -1.779224 | 5.336161  |
| 31 | 1 | 0 | 6.323684  | 0.522419  | 5.669777  |
| 32 | 6 | 0 | 3.905303  | -2.374369 | 7.113540  |
| 33 | 1 | 0 | 5.732410  | -1.268456 | 7.201094  |
| 34 | 1 | 0 | 4.138438  | -2.999018 | 7.966166  |
| 35 | 6 | 0 | 2.688928  | -2.551558 | 6.423987  |
| 36 | 1 | 0 | 1.443716  | -1.960530 | 4.819801  |
| 37 | 1 | 0 | 1.991778  | -3.313035 | 6.750996  |
| 38 | 1 | 0 | -1.166325 | -0.888063 | -1.476837 |
| 39 | 1 | 0 | -2.063963 | 0.080981  | -0.286293 |
| 40 | 1 | 0 | -1.087038 | 0.888513  | -1.533448 |



|    |   |   |           |           |          |
|----|---|---|-----------|-----------|----------|
| 41 | 6 | 0 | 4.470097  | 2.799634  | 1.871518 |
| 42 | 1 | 0 | 3.987547  | 3.269943  | 1.018454 |
| 43 | 1 | 0 | 4.713590  | 3.558830  | 2.616890 |
| 44 | 1 | 0 | 5.380666  | 2.294506  | 1.543056 |
| 45 | 9 | 0 | -0.795819 | -0.893921 | 5.321347 |
| 46 | 5 | 0 | -1.526862 | -2.095146 | 5.333516 |
| 47 | 9 | 0 | -2.149429 | -2.246275 | 6.572038 |
| 48 | 9 | 0 | -2.489971 | -2.057846 | 4.319626 |
| 49 | 9 | 0 | -0.654002 | -3.165498 | 5.105230 |

---

**Ion couple  $\Gamma^+ \text{BF}_4^-$  (*s,p*) (Table S-1b)**

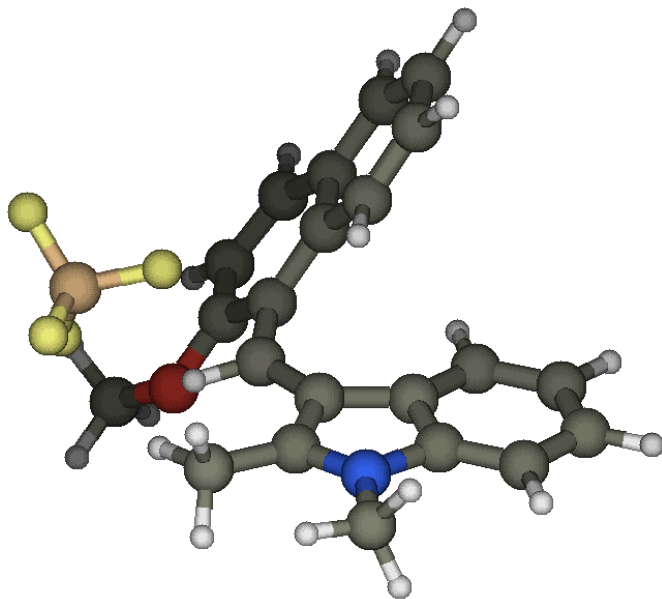


---

|    |   |   |           |           |           |
|----|---|---|-----------|-----------|-----------|
| 1  | 7 | 0 | 0.000739  | -0.026075 | 0.025580  |
| 2  | 6 | 0 | 0.015609  | -0.026440 | 1.341452  |
| 3  | 6 | 0 | 1.392888  | -0.050567 | 1.795922  |
| 4  | 6 | 0 | 2.209518  | -0.015434 | 0.583106  |
| 5  | 6 | 0 | 1.314397  | -0.000027 | -0.489126 |
| 6  | 6 | 0 | 1.702979  | 0.064730  | -1.812456 |
| 7  | 6 | 0 | 3.069697  | 0.129107  | -2.056811 |
| 8  | 6 | 0 | 3.985980  | 0.141646  | -1.006659 |
| 9  | 6 | 0 | 3.571065  | 0.071756  | 0.318317  |
| 10 | 6 | 0 | -1.221590 | -0.038689 | 2.151218  |
| 11 | 1 | 0 | -1.892400 | 0.756692  | 1.822567  |
| 12 | 1 | 0 | -1.736457 | -0.993504 | 2.022246  |
| 13 | 1 | 0 | -1.007602 | 0.086834  | 3.207568  |
| 14 | 6 | 0 | -1.166009 | -0.045644 | -0.838729 |
| 15 | 1 | 0 | 0.982925  | 0.073384  | -2.619973 |
| 16 | 1 | 0 | 3.424827  | 0.180223  | -3.077706 |
| 17 | 1 | 0 | 5.043636  | 0.207576  | -1.226429 |
| 18 | 1 | 0 | 4.298534  | 0.092667  | 1.117134  |
| 19 | 6 | 0 | 1.707048  | -0.057678 | 3.118314  |
| 20 | 6 | 0 | 2.996699  | -0.226297 | 3.748674  |
| 21 | 1 | 0 | 0.892998  | 0.115572  | 3.812863  |
| 22 | 6 | 0 | 3.264709  | 0.609769  | 4.834381  |
| 23 | 6 | 0 | 4.496852  | 0.540495  | 5.520339  |
| 24 | 6 | 0 | 5.433100  | -0.371509 | 5.128719  |
| 25 | 6 | 0 | 5.187824  | -1.286395 | 4.077673  |
| 26 | 6 | 0 | 3.947872  | -1.236568 | 3.389822  |
| 27 | 8 | 0 | 2.320332  | 1.512863  | 5.139127  |

|    |   |   |           |           |           |
|----|---|---|-----------|-----------|-----------|
| 28 | 1 | 0 | 4.704773  | 1.214832  | 6.337839  |
| 29 | 6 | 0 | 6.146006  | -2.270767 | 3.737066  |
| 30 | 6 | 0 | 3.681660  | -2.245331 | 2.432682  |
| 31 | 1 | 0 | 6.386472  | -0.417109 | 5.642113  |
| 32 | 6 | 0 | 5.877613  | -3.201947 | 2.773406  |
| 33 | 1 | 0 | 7.088894  | -2.278097 | 4.271224  |
| 34 | 1 | 0 | 6.610031  | -3.956805 | 2.518447  |
| 35 | 6 | 0 | 4.621766  | -3.194867 | 2.132343  |
| 36 | 1 | 0 | 2.716806  | -2.281769 | 1.947077  |
| 37 | 1 | 0 | 4.391699  | -3.958932 | 1.400391  |
| 38 | 1 | 0 | -1.083115 | -0.890173 | -1.521336 |
| 39 | 1 | 0 | -2.063766 | -0.149401 | -0.239383 |
| 40 | 1 | 0 | -1.205316 | 0.881377  | -1.410073 |
| 41 | 6 | 0 | 2.464580  | 2.289758  | 6.322697  |
| 42 | 1 | 0 | 1.545110  | 2.861712  | 6.412475  |
| 43 | 1 | 0 | 2.583455  | 1.648442  | 7.197415  |
| 44 | 1 | 0 | 3.312035  | 2.972243  | 6.239296  |
| 45 | 9 | 0 | -2.121593 | -2.132417 | 4.568344  |
| 46 | 5 | 0 | -0.777066 | -2.131844 | 4.954829  |
| 47 | 9 | 0 | -0.575226 | -3.072692 | 5.964849  |
| 48 | 9 | 0 | 0.026110  | -2.445371 | 3.849559  |
| 49 | 9 | 0 | -0.432717 | -0.854861 | 5.427595  |

**Ion couple  $\text{I}^+ \text{BF}_4^-$  (*s,pl*) (Table S-1b)**

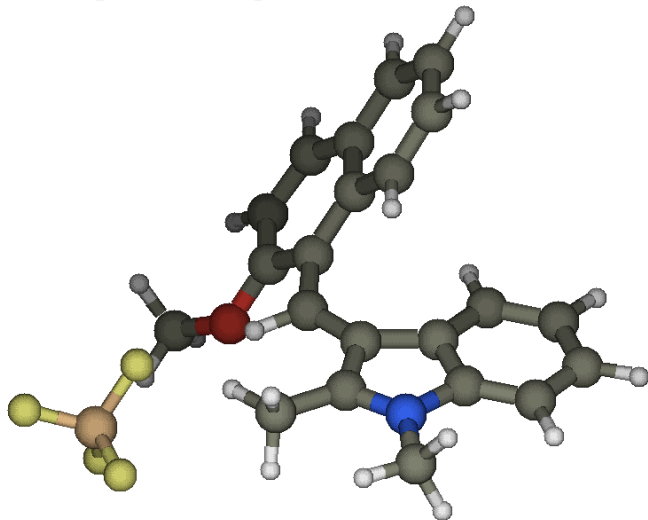

**$\text{BF}_4^-$  (Table S-1b)**

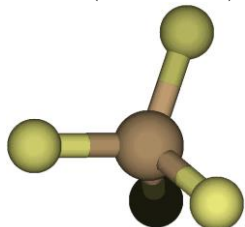

|   |   |   |           |           |           |
|---|---|---|-----------|-----------|-----------|
| 1 | 5 | 0 | 0.000000  | 0.000000  | 0.000000  |
| 2 | 9 | 0 | 0.000000  | -0.000000 | 1.399936  |
| 3 | 9 | 0 | 1.319872  | -0.000000 | -0.466645 |
| 4 | 9 | 0 | -0.659936 | -1.143043 | -0.466645 |
| 5 | 9 | 0 | -0.659936 | 1.143043  | -0.466645 |

**C<sub>6</sub>H<sub>5</sub>SO<sub>2</sub>Na 2a** (Table S-1d)

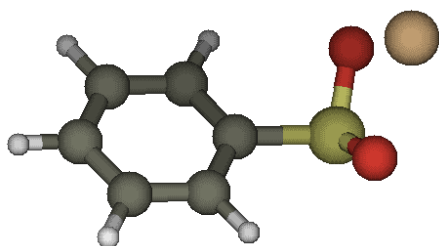


---

|    |    |   |           |           |           |
|----|----|---|-----------|-----------|-----------|
| 1  | 16 | 0 | 0.060999  | 0.017678  | 0.014193  |
| 2  | 6  | 0 | 0.027292  | 0.018210  | 1.823057  |
| 3  | 6  | 0 | 1.226571  | -0.020853 | 2.524115  |
| 4  | 8  | 0 | -1.238407 | 0.717837  | -0.327167 |
| 5  | 8  | 0 | 1.191409  | 0.984068  | -0.278821 |
| 6  | 11 | 0 | -0.203617 | 2.619706  | -0.915974 |
| 7  | 6  | 0 | 1.208029  | -0.071390 | 3.911520  |
| 8  | 1  | 0 | 2.165781  | 0.005045  | 1.984772  |
| 9  | 1  | 0 | 2.139450  | -0.093684 | 4.463531  |
| 10 | 6  | 0 | -0.004994 | -0.089311 | 4.591347  |
| 11 | 6  | 0 | -1.200507 | -0.055514 | 3.884294  |
| 12 | 1  | 0 | -0.017465 | -0.128003 | 5.673474  |
| 13 | 6  | 0 | -1.186967 | -0.006657 | 2.495236  |
| 14 | 1  | 0 | -2.144725 | -0.065312 | 4.414600  |
| 15 | 1  | 0 | -2.110326 | 0.028833  | 1.930602  |

---

**C-S Adduct 2a + I<sup>+</sup> BF<sub>4</sub><sup>-</sup>** (Table S-2a)

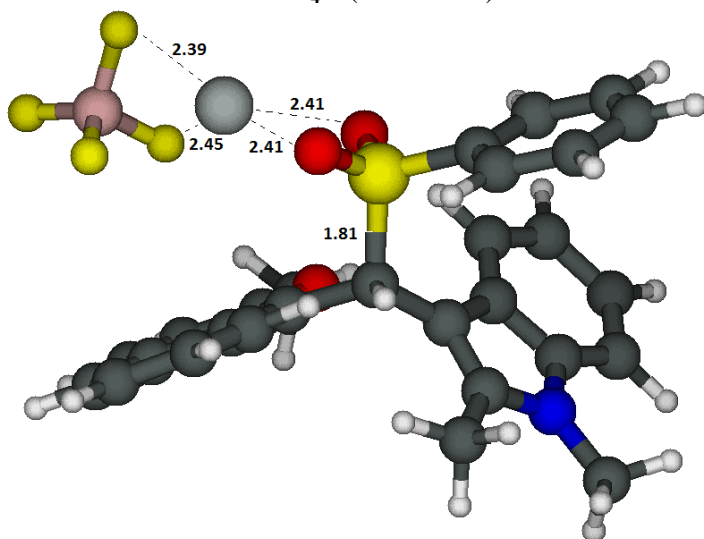


---

|    |   |   |           |           |           |
|----|---|---|-----------|-----------|-----------|
| 1  | 7 | 0 | 0.004291  | -0.022757 | 0.028487  |
| 2  | 6 | 0 | 0.015781  | -0.003459 | 1.397915  |
| 3  | 6 | 0 | 1.318125  | -0.028699 | 1.853841  |
| 4  | 6 | 0 | 2.165616  | -0.058722 | 0.686830  |
| 5  | 6 | 0 | 1.296906  | -0.057949 | -0.428844 |
| 6  | 6 | 0 | 1.753090  | -0.084951 | -1.746876 |
| 7  | 6 | 0 | 3.118214  | -0.127257 | -1.949809 |
| 8  | 6 | 0 | 4.004667  | -0.134464 | -0.861003 |
| 9  | 6 | 0 | 3.547303  | -0.096576 | 0.442590  |
| 10 | 6 | 0 | -1.260391 | 0.060269  | 2.164406  |
| 11 | 1 | 0 | -1.884542 | 0.879966  | 1.803947  |
| 12 | 1 | 0 | -1.832749 | -0.864963 | 2.060608  |

---

|    |    |   |           |           |           |
|----|----|---|-----------|-----------|-----------|
| 13 | 1  | 0 | -1.075389 | 0.234807  | 3.222537  |
| 14 | 6  | 0 | -1.159807 | 0.035151  | -0.829121 |
| 15 | 1  | 0 | 1.060403  | -0.069840 | -2.578863 |
| 16 | 1  | 0 | 3.509026  | -0.149649 | -2.959239 |
| 17 | 1  | 0 | 5.071265  | -0.160638 | -1.047359 |
| 18 | 1  | 0 | 4.246527  | -0.085417 | 1.265261  |
| 19 | 6  | 0 | 1.597373  | -0.110654 | 3.331079  |
| 20 | 6  | 0 | 1.818790  | 1.148607  | 4.149585  |
| 21 | 1  | 0 | 0.733770  | -0.620550 | 3.754522  |
| 22 | 6  | 0 | 2.696161  | 2.127293  | 3.710397  |
| 23 | 6  | 0 | 2.845863  | 3.346516  | 4.415224  |
| 24 | 6  | 0 | 2.126032  | 3.566864  | 5.549437  |
| 25 | 6  | 0 | 1.235726  | 2.593118  | 6.055146  |
| 26 | 6  | 0 | 1.083499  | 1.360754  | 5.360509  |
| 27 | 8  | 0 | 3.383438  | 1.867304  | 2.587116  |
| 28 | 1  | 0 | 3.536366  | 4.095738  | 4.057482  |
| 29 | 6  | 0 | 0.511026  | 2.836338  | 7.246899  |
| 30 | 6  | 0 | 0.193558  | 0.406891  | 5.927154  |
| 31 | 1  | 0 | 2.241657  | 4.497688  | 6.091967  |
| 32 | 6  | 0 | -0.342298 | 1.899391  | 7.754621  |
| 33 | 1  | 0 | 0.656011  | 3.786475  | 7.747841  |
| 34 | 1  | 0 | -0.892290 | 2.089162  | 8.667173  |
| 35 | 6  | 0 | -0.494551 | 0.670426  | 7.080178  |
| 36 | 1  | 0 | 0.055072  | -0.561877 | 5.469422  |
| 37 | 1  | 0 | -1.160482 | -0.082006 | 7.484075  |
| 38 | 1  | 0 | -1.047668 | -0.680970 | -1.642676 |
| 39 | 1  | 0 | -2.047308 | -0.228391 | -0.260597 |
| 40 | 1  | 0 | -1.286779 | 1.034718  | -1.249482 |
| 41 | 6  | 0 | 4.229965  | 2.865569  | 2.039683  |
| 42 | 1  | 0 | 4.633054  | 2.439417  | 1.124062  |
| 43 | 1  | 0 | 3.665512  | 3.769131  | 1.799466  |
| 44 | 1  | 0 | 5.047372  | 3.105789  | 2.721287  |
| 45 | 16 | 0 | 2.862842  | -1.318037 | 3.796577  |
| 46 | 6  | 0 | 2.434637  | -2.798901 | 2.952933  |
| 47 | 6  | 0 | 1.307397  | -3.495308 | 3.374994  |
| 48 | 6  | 0 | 0.947312  | -4.646600 | 2.694089  |
| 49 | 6  | 0 | 1.709609  | -5.083410 | 1.615363  |
| 50 | 6  | 0 | 2.835795  | -4.378122 | 1.212304  |
| 51 | 6  | 0 | 3.207556  | -3.220166 | 1.881381  |
| 52 | 1  | 0 | 0.731354  | -3.150562 | 4.225318  |
| 53 | 1  | 0 | 0.075663  | -5.205691 | 3.007449  |
| 54 | 1  | 0 | 1.423825  | -5.984340 | 1.087531  |
| 55 | 1  | 0 | 3.427172  | -4.725692 | 0.375596  |
| 56 | 1  | 0 | 4.080022  | -2.655149 | 1.581843  |
| 57 | 8  | 0 | 4.195360  | -0.893730 | 3.407304  |
| 58 | 8  | 0 | 2.721005  | -1.512888 | 5.233586  |
| 59 | 11 | 0 | 4.673590  | -0.153953 | 5.648017  |
| 60 | 5  | 0 | 5.994238  | 1.888339  | 6.410705  |
| 61 | 9  | 0 | 6.685075  | 2.976742  | 6.868628  |
| 62 | 9  | 0 | 4.725292  | 1.768392  | 7.016746  |
| 63 | 9  | 0 | 5.778587  | 1.936895  | 5.021170  |
| 64 | 9  | 0 | 6.670685  | 0.676890  | 6.671020  |

---

Complex A 2a + I<sup>+</sup> BF<sub>4</sub><sup>-</sup> (Table S-2a)

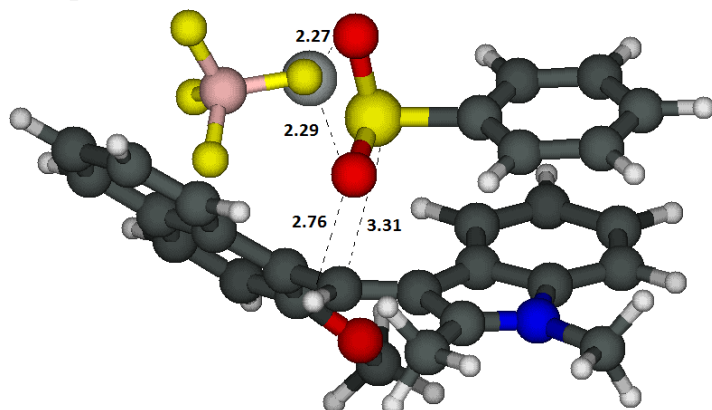

|    |   |   |           |           |           |
|----|---|---|-----------|-----------|-----------|
| 1  | 7 | 0 | 0.034687  | -0.078960 | 0.040624  |
| 2  | 6 | 0 | 0.057456  | -0.118504 | 1.356525  |
| 3  | 6 | 0 | 1.437050  | -0.091870 | 1.806976  |
| 4  | 6 | 0 | 2.248163  | -0.116532 | 0.595957  |
| 5  | 6 | 0 | 1.351626  | -0.103407 | -0.474540 |
| 6  | 6 | 0 | 1.740080  | -0.153333 | -1.798977 |
| 7  | 6 | 0 | 3.104353  | -0.253326 | -2.044782 |
| 8  | 6 | 0 | 4.019497  | -0.315331 | -0.994584 |
| 9  | 6 | 0 | 3.605818  | -0.245733 | 0.330472  |
| 10 | 6 | 0 | -1.131958 | -0.180548 | 2.231994  |
| 11 | 1 | 0 | -1.205605 | 0.732924  | 2.824740  |
| 12 | 1 | 0 | -2.055495 | -0.315384 | 1.678831  |
| 13 | 1 | 0 | -0.999876 | -1.023414 | 2.915527  |
| 14 | 6 | 0 | -1.111207 | -0.016065 | -0.849831 |
| 15 | 1 | 0 | 1.021516  | -0.135668 | -2.607754 |
| 16 | 1 | 0 | 3.457703  | -0.301017 | -3.066527 |
| 17 | 1 | 0 | 5.073984  | -0.419684 | -1.215704 |
| 18 | 1 | 0 | 4.329466  | -0.312224 | 1.131284  |
| 19 | 6 | 0 | 1.735484  | -0.122966 | 3.134871  |
| 20 | 6 | 0 | 2.997610  | 0.051783  | 3.808145  |
| 21 | 1 | 0 | 0.892281  | -0.323873 | 3.788669  |
| 22 | 6 | 0 | 3.927347  | 1.005905  | 3.383380  |
| 23 | 6 | 0 | 5.137015  | 1.203463  | 4.089504  |
| 24 | 6 | 0 | 5.393168  | 0.480718  | 5.216540  |
| 25 | 6 | 0 | 4.467799  | -0.464451 | 5.720437  |
| 26 | 6 | 0 | 3.253792  | -0.678562 | 5.022100  |
| 27 | 8 | 0 | 3.594150  | 1.762004  | 2.331909  |
| 28 | 1 | 0 | 5.850690  | 1.936985  | 3.745095  |
| 29 | 6 | 0 | 4.745382  | -1.191649 | 6.900978  |
| 30 | 6 | 0 | 2.354142  | -1.642503 | 5.537713  |
| 31 | 1 | 0 | 6.321247  | 0.635496  | 5.754576  |
| 32 | 6 | 0 | 3.849035  | -2.103933 | 7.384807  |
| 33 | 1 | 0 | 5.684423  | -1.009046 | 7.410179  |
| 34 | 1 | 0 | 4.062784  | -2.659779 | 8.288463  |
| 35 | 6 | 0 | 2.642664  | -2.324660 | 6.691847  |
| 36 | 1 | 0 | 1.433883  | -1.866764 | 5.014534  |
| 37 | 1 | 0 | 1.935145  | -3.052763 | 7.069523  |
| 38 | 1 | 0 | -1.041302 | -0.830398 | -1.569375 |
| 39 | 1 | 0 | -2.033528 | -0.104510 | -0.288676 |
| 40 | 1 | 0 | -1.092762 | 0.936800  | -1.378451 |
| 41 | 6 | 0 | 4.546422  | 2.664846  | 1.784317  |
| 42 | 1 | 0 | 4.075982  | 3.084459  | 0.898728  |
| 43 | 1 | 0 | 4.777124  | 3.465071  | 2.489672  |
| 44 | 1 | 0 | 5.462228  | 2.143480  | 1.499280  |

|    |    |   |           |           |           |
|----|----|---|-----------|-----------|-----------|
| 45 | 16 | 0 | 1.596227  | -3.390351 | 2.644800  |
| 46 | 6  | 0 | 1.186826  | -3.435108 | 0.880196  |
| 47 | 6  | 0 | -0.126221 | -3.356143 | 0.444201  |
| 48 | 6  | 0 | -0.401912 | -3.459442 | -0.915685 |
| 49 | 6  | 0 | 0.635031  | -3.622311 | -1.826247 |
| 50 | 6  | 0 | 1.952584  | -3.681003 | -1.381964 |
| 51 | 6  | 0 | 2.230010  | -3.586003 | -0.025789 |
| 52 | 1  | 0 | -0.920126 | -3.221022 | 1.170186  |
| 53 | 1  | 0 | -1.426898 | -3.415027 | -1.263724 |
| 54 | 1  | 0 | 0.418136  | -3.700434 | -2.884538 |
| 55 | 1  | 0 | 2.760824  | -3.799860 | -2.092903 |
| 56 | 1  | 0 | 3.254185  | -3.634196 | 0.329687  |
| 57 | 8  | 0 | 1.789582  | -4.854769 | 2.964625  |
| 58 | 8  | 0 | 0.280875  | -2.964902 | 3.267645  |
| 59 | 11 | 0 | -0.120189 | -5.022419 | 4.185257  |
| 60 | 9  | 0 | -2.084726 | -6.016780 | 4.729595  |
| 61 | 5  | 0 | -2.005272 | -5.829565 | 6.134464  |
| 62 | 9  | 0 | -0.774981 | -5.160933 | 6.360793  |
| 63 | 9  | 0 | -3.055367 | -5.039858 | 6.562158  |
| 64 | 9  | 0 | -2.000143 | -7.054695 | 6.772313  |

**C<sub>6</sub>H<sub>5</sub>SO<sub>2</sub> anion 2a<sup>-</sup>** (Table S-2b)

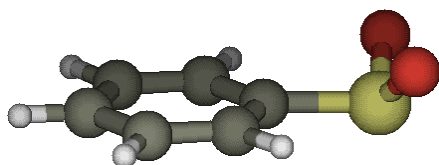

|    |    |   |           |           |           |
|----|----|---|-----------|-----------|-----------|
| 1  | 16 | 0 | 0.018749  | 0.005871  | 0.021004  |
| 2  | 6  | 0 | 0.006003  | 0.003172  | 1.849908  |
| 3  | 6  | 0 | 1.208186  | -0.016460 | 2.547395  |
| 4  | 8  | 0 | -1.301806 | 0.646621  | -0.283773 |
| 5  | 8  | 0 | 1.176284  | 0.916667  | -0.261461 |
| 6  | 6  | 0 | 1.207962  | -0.075267 | 3.935670  |
| 7  | 1  | 0 | 2.139076  | 0.038289  | 1.994752  |
| 8  | 1  | 0 | 2.145947  | -0.080742 | 4.478308  |
| 9  | 6  | 0 | 0.003266  | -0.119186 | 4.629926  |
| 10 | 6  | 0 | -1.198940 | -0.101022 | 3.932290  |
| 11 | 1  | 0 | 0.002240  | -0.162838 | 5.712319  |
| 12 | 6  | 0 | -1.196506 | -0.045000 | 2.542756  |
| 13 | 1  | 0 | -2.138321 | -0.126257 | 4.472041  |
| 14 | 1  | 0 | -2.123716 | -0.012968 | 1.982746  |

Complex A' 2a<sup>-</sup> + I<sup>+</sup> (Table S-2b)

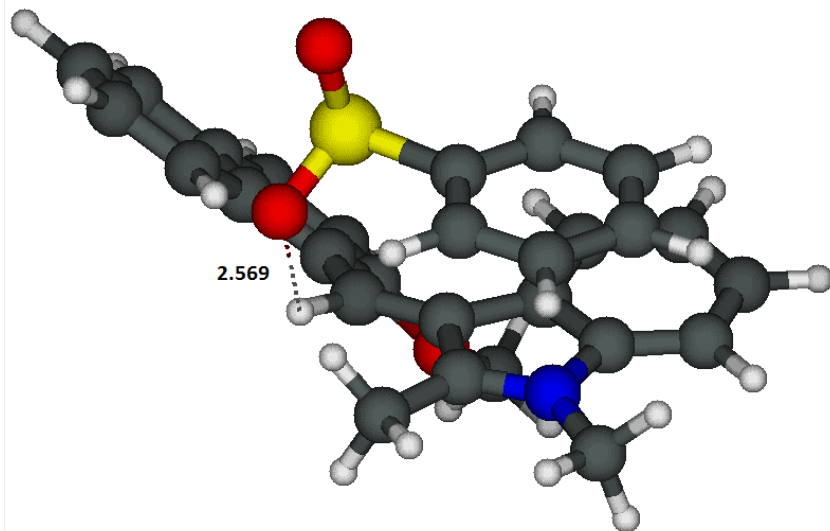

|    |   |   |           |           |           |
|----|---|---|-----------|-----------|-----------|
| 1  | 7 | 0 | 0.002990  | -0.022531 | 0.024006  |
| 2  | 6 | 0 | -0.007105 | -0.023757 | 1.342127  |
| 3  | 6 | 0 | 1.362571  | -0.019051 | 1.826414  |
| 4  | 6 | 0 | 2.199868  | -0.089244 | 0.634156  |
| 5  | 6 | 0 | 1.331173  | -0.077395 | -0.457905 |
| 6  | 6 | 0 | 1.752703  | -0.154157 | -1.771282 |
| 7  | 6 | 0 | 3.120273  | -0.283887 | -1.981550 |
| 8  | 6 | 0 | 4.007778  | -0.347638 | -0.907726 |
| 9  | 6 | 0 | 3.561058  | -0.248959 | 0.404244  |
| 10 | 6 | 0 | -1.220015 | 0.023319  | 2.183681  |
| 11 | 1 | 0 | -1.296205 | 1.004129  | 2.658723  |
| 12 | 1 | 0 | -2.127749 | -0.164275 | 1.618744  |
| 13 | 1 | 0 | -1.122702 | -0.735760 | 2.966839  |
| 14 | 6 | 0 | -1.122054 | 0.104118  | -0.887879 |
| 15 | 1 | 0 | 1.056186  | -0.133143 | -2.598884 |
| 16 | 1 | 0 | 3.497761  | -0.352149 | -2.993446 |
| 17 | 1 | 0 | 5.065328  | -0.474789 | -1.100051 |
| 18 | 1 | 0 | 4.263478  | -0.311446 | 1.224261  |
| 19 | 6 | 0 | 1.632945  | 0.021674  | 3.161464  |
| 20 | 6 | 0 | 2.882477  | 0.255615  | 3.844568  |
| 21 | 1 | 0 | 0.777855  | -0.151824 | 3.807474  |
| 22 | 6 | 0 | 3.817679  | 1.177616  | 3.362292  |
| 23 | 6 | 0 | 5.025458  | 1.419364  | 4.057318  |
| 24 | 6 | 0 | 5.273331  | 0.779356  | 5.234778  |
| 25 | 6 | 0 | 4.334803  | -0.111804 | 5.806529  |
| 26 | 6 | 0 | 3.120761  | -0.368408 | 5.121212  |
| 27 | 8 | 0 | 3.494235  | 1.863792  | 2.260562  |
| 28 | 1 | 0 | 5.745728  | 2.120222  | 3.662551  |
| 29 | 6 | 0 | 4.597574  | -0.738401 | 7.046798  |
| 30 | 6 | 0 | 2.197960  | -1.259718 | 5.720041  |
| 31 | 1 | 0 | 6.201276  | 0.964969  | 5.763252  |
| 32 | 6 | 0 | 3.683648  | -1.588424 | 7.604856  |
| 33 | 1 | 0 | 5.538196  | -0.527500 | 7.542049  |
| 34 | 1 | 0 | 3.885402  | -2.067450 | 8.554258  |
| 35 | 6 | 0 | 2.472853  | -1.841769 | 6.930986  |
| 36 | 1 | 0 | 1.266318  | -1.503107 | 5.225458  |
| 37 | 1 | 0 | 1.747793  | -2.516732 | 7.369013  |
| 38 | 1 | 0 | -1.029834 | -0.647354 | -1.668711 |
| 39 | 1 | 0 | -2.056074 | -0.044559 | -0.359554 |
| 40 | 1 | 0 | -1.104174 | 1.099079  | -1.333645 |

|    |    |   |           |           |           |
|----|----|---|-----------|-----------|-----------|
| 41 | 6  | 0 | 4.446974  | 2.734886  | 1.665924  |
| 42 | 1  | 0 | 3.981789  | 3.096877  | 0.752466  |
| 43 | 1  | 0 | 4.668507  | 3.578448  | 2.322381  |
| 44 | 1  | 0 | 5.367632  | 2.202103  | 1.420144  |
| 45 | 16 | 0 | 0.686145  | -3.328847 | 3.333070  |
| 46 | 6  | 0 | 0.144410  | -3.282185 | 1.592079  |
| 47 | 6  | 0 | -1.207807 | -3.214956 | 1.278600  |
| 48 | 6  | 0 | -1.610002 | -3.251488 | -0.048840 |
| 49 | 6  | 0 | -0.659040 | -3.350743 | -1.062814 |
| 50 | 6  | 0 | 0.691768  | -3.408544 | -0.746325 |
| 51 | 6  | 0 | 1.093577  | -3.372569 | 0.586034  |
| 52 | 1  | 0 | -1.929833 | -3.135031 | 2.083796  |
| 53 | 1  | 0 | -2.663588 | -3.204970 | -0.298957 |
| 54 | 1  | 0 | -0.974547 | -3.381211 | -2.098841 |
| 55 | 1  | 0 | 1.432542  | -3.481195 | -1.533597 |
| 56 | 1  | 0 | 2.147575  | -3.416896 | 0.842880  |
| 57 | 8  | 0 | 0.462333  | -4.766305 | 3.674997  |
| 58 | 8  | 0 | -0.347407 | -2.453417 | 3.992672  |

Complex S<sub>1</sub>-A' 2a<sup>-</sup> + I<sup>+</sup> (Table S-2b)

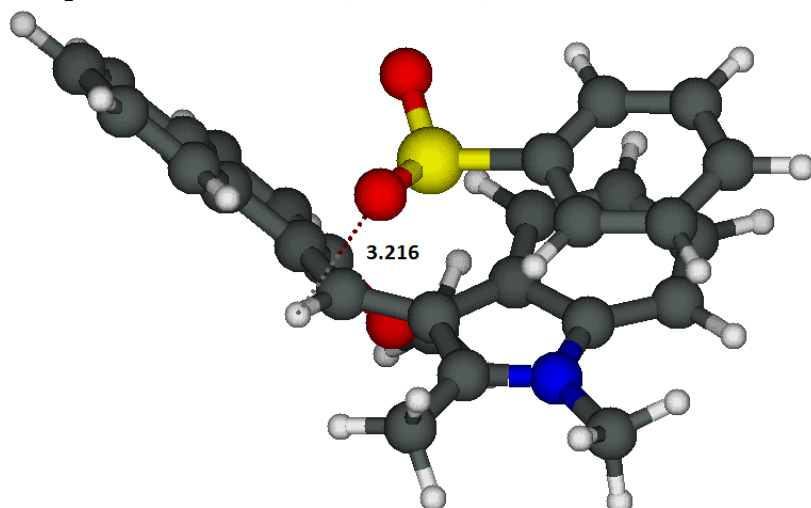

|    |   |   |           |           |           |
|----|---|---|-----------|-----------|-----------|
| 1  | 7 | 0 | -0.013952 | -0.020189 | 0.021708  |
| 2  | 6 | 0 | -0.011240 | -0.033391 | 1.383768  |
| 3  | 6 | 0 | 1.315321  | -0.004032 | 1.864404  |
| 4  | 6 | 0 | 2.150572  | -0.028734 | 0.671964  |
| 5  | 6 | 0 | 1.285607  | -0.018389 | -0.441754 |
| 6  | 6 | 0 | 1.749005  | -0.057192 | -1.753911 |
| 7  | 6 | 0 | 3.116273  | -0.157011 | -1.943087 |
| 8  | 6 | 0 | 3.993470  | -0.228226 | -0.852021 |
| 9  | 6 | 0 | 3.522833  | -0.162754 | 0.449079  |
| 10 | 6 | 0 | -1.281764 | -0.058659 | 2.151067  |
| 11 | 1 | 0 | -1.971790 | 0.709416  | 1.795139  |
| 12 | 1 | 0 | -1.782686 | -1.026512 | 2.051453  |
| 13 | 1 | 0 | -1.094274 | 0.117696  | 3.207291  |
| 14 | 6 | 0 | -1.191666 | 0.024839  | -0.816954 |
| 15 | 1 | 0 | 1.070057  | -0.023170 | -2.596066 |
| 16 | 1 | 0 | 3.512074  | -0.195567 | -2.950247 |
| 17 | 1 | 0 | 5.056425  | -0.331371 | -1.030513 |
| 18 | 1 | 0 | 4.214488  | -0.227302 | 1.279182  |
| 19 | 6 | 0 | 1.656181  | -0.124243 | 3.224622  |
| 20 | 6 | 0 | 2.937936  | 0.064454  | 3.857247  |
| 21 | 1 | 0 | 0.843751  | -0.397744 | 3.886005  |



|    |    |   |           |           |           |
|----|----|---|-----------|-----------|-----------|
| 22 | 6  | 0 | 3.829263  | 1.067561  | 3.462716  |
| 23 | 6  | 0 | 5.069234  | 1.249726  | 4.106396  |
| 24 | 6  | 0 | 5.418238  | 0.470867  | 5.175826  |
| 25 | 6  | 0 | 4.543720  | -0.529158 | 5.654474  |
| 26 | 6  | 0 | 3.303969  | -0.741641 | 4.993724  |
| 27 | 8  | 0 | 3.412238  | 1.898052  | 2.479134  |
| 28 | 1  | 0 | 5.738720  | 2.029581  | 3.772225  |
| 29 | 6  | 0 | 4.892177  | -1.327123 | 6.772892  |
| 30 | 6  | 0 | 2.474166  | -1.787281 | 5.474763  |
| 31 | 1  | 0 | 6.367823  | 0.623228  | 5.674460  |
| 32 | 6  | 0 | 4.056310  | -2.308350 | 7.225254  |
| 33 | 1  | 0 | 5.842404  | -1.140499 | 7.260441  |
| 34 | 1  | 0 | 4.330291  | -2.913139 | 8.080411  |
| 35 | 6  | 0 | 2.834374  | -2.541744 | 6.558884  |
| 36 | 1  | 0 | 1.544919  | -2.009874 | 4.968081  |
| 37 | 1  | 0 | 2.180580  | -3.334621 | 6.900504  |
| 38 | 1  | 0 | -0.961016 | -0.422015 | -1.781733 |
| 39 | 1  | 0 | -1.995469 | -0.545868 | -0.355510 |
| 40 | 1  | 0 | -1.524691 | 1.053622  | -0.969480 |
| 41 | 6  | 0 | 4.349277  | 2.767954  | 1.874121  |
| 42 | 1  | 0 | 3.837028  | 3.216263  | 1.025342  |
| 43 | 1  | 0 | 4.664791  | 3.556896  | 2.561428  |
| 44 | 1  | 0 | 5.226704  | 2.221844  | 1.518120  |
| 45 | 16 | 0 | 1.400502  | -2.971909 | 1.975337  |
| 46 | 6  | 0 | 1.140812  | -3.274851 | 0.236301  |
| 47 | 6  | 0 | -0.146578 | -3.183541 | -0.268146 |
| 48 | 6  | 0 | -0.334529 | -3.354807 | -1.632850 |
| 49 | 6  | 0 | 0.755735  | -3.599739 | -2.459051 |
| 50 | 6  | 0 | 2.039920  | -3.675027 | -1.932937 |
| 51 | 6  | 0 | 2.244801  | -3.500591 | -0.571877 |
| 52 | 1  | 0 | -0.980998 | -2.992938 | 0.394791  |
| 53 | 1  | 0 | -1.332190 | -3.297632 | -2.048418 |
| 54 | 1  | 0 | 0.603164  | -3.732385 | -3.522582 |
| 55 | 1  | 0 | 2.884985  | -3.863082 | -2.582035 |
| 56 | 1  | 0 | 3.236507  | -3.549038 | -0.142407 |
| 57 | 8  | 0 | 2.664502  | -3.568780 | 2.364831  |
| 58 | 8  | 0 | 0.186857  | -3.313321 | 2.697769  |

Complex T<sub>1</sub>-A' 2a<sup>-</sup> + I<sup>+</sup> (Table S-2b)

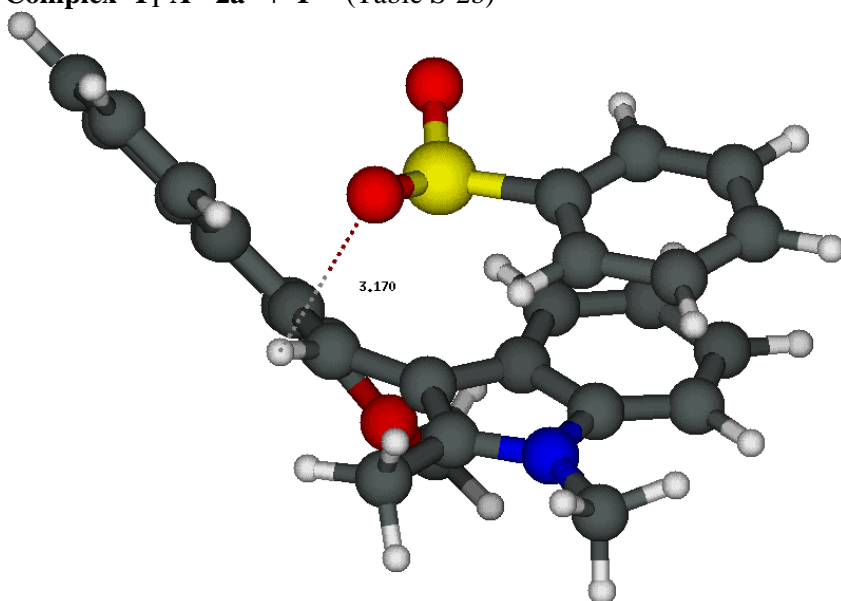

|    |    |   |           |           |           |
|----|----|---|-----------|-----------|-----------|
| 1  | 7  | 0 | 0.030145  | -0.015095 | 0.006607  |
| 2  | 6  | 0 | 0.015850  | -0.034694 | 1.371508  |
| 3  | 6  | 0 | 1.329235  | -0.045731 | 1.864275  |
| 4  | 6  | 0 | 2.182601  | -0.067455 | 0.688876  |
| 5  | 6  | 0 | 1.335275  | -0.032329 | -0.437880 |
| 6  | 6  | 0 | 1.821411  | -0.055092 | -1.742675 |
| 7  | 6  | 0 | 3.191072  | -0.159993 | -1.910864 |
| 8  | 6  | 0 | 4.049831  | -0.252450 | -0.806644 |
| 9  | 6  | 0 | 3.558054  | -0.205623 | 0.487227  |
| 10 | 6  | 0 | -1.266687 | -0.035229 | 2.120878  |
| 11 | 1  | 0 | -1.919474 | 0.772182  | 1.781307  |
| 12 | 1  | 0 | -1.807215 | -0.976449 | 1.983068  |
| 13 | 1  | 0 | -1.086738 | 0.100019  | 3.184596  |
| 14 | 6  | 0 | -1.135748 | 0.048500  | -0.846357 |
| 15 | 1  | 0 | 1.156853  | -0.003233 | -2.595554 |
| 16 | 1  | 0 | 3.603386  | -0.184748 | -2.911862 |
| 17 | 1  | 0 | 5.115239  | -0.357103 | -0.969486 |
| 18 | 1  | 0 | 4.235329  | -0.283452 | 1.328349  |
| 19 | 6  | 0 | 1.657097  | -0.154846 | 3.240204  |
| 20 | 6  | 0 | 2.922007  | 0.052256  | 3.883748  |
| 21 | 1  | 0 | 0.854527  | -0.502292 | 3.879040  |
| 22 | 6  | 0 | 3.803327  | 1.071269  | 3.493151  |
| 23 | 6  | 0 | 5.028855  | 1.282140  | 4.153245  |
| 24 | 6  | 0 | 5.377256  | 0.517315  | 5.233220  |
| 25 | 6  | 0 | 4.518101  | -0.502360 | 5.703664  |
| 26 | 6  | 0 | 3.292757  | -0.746478 | 5.027853  |
| 27 | 8  | 0 | 3.382353  | 1.885297  | 2.499823  |
| 28 | 1  | 0 | 5.687373  | 2.073355  | 3.823848  |
| 29 | 6  | 0 | 4.873189  | -1.290509 | 6.825607  |
| 30 | 6  | 0 | 2.489225  | -1.818505 | 5.492796  |
| 31 | 1  | 0 | 6.316026  | 0.691868  | 5.745006  |
| 32 | 6  | 0 | 4.059294  | -2.296588 | 7.265967  |
| 33 | 1  | 0 | 5.811402  | -1.078358 | 7.325791  |
| 34 | 1  | 0 | 4.338928  | -2.894314 | 8.124236  |
| 35 | 6  | 0 | 2.856398  | -2.565060 | 6.581583  |
| 36 | 1  | 0 | 1.575014  | -2.071706 | 4.972748  |
| 37 | 1  | 0 | 2.221856  | -3.378634 | 6.910640  |
| 38 | 1  | 0 | -0.898486 | -0.397276 | -1.810267 |
| 39 | 1  | 0 | -1.952461 | -0.514620 | -0.398010 |
| 40 | 1  | 0 | -1.455402 | 1.081565  | -0.999766 |
| 41 | 6  | 0 | 4.308539  | 2.770739  | 1.899555  |
| 42 | 1  | 0 | 3.798092  | 3.200089  | 1.039987  |
| 43 | 1  | 0 | 4.596951  | 3.571908  | 2.584545  |
| 44 | 1  | 0 | 5.202017  | 2.240072  | 1.560678  |
| 45 | 16 | 0 | 1.603832  | -3.136939 | 2.033209  |
| 46 | 6  | 0 | 1.264971  | -3.338998 | 0.299332  |
| 47 | 6  | 0 | -0.041689 | -3.193319 | -0.144996 |
| 48 | 6  | 0 | -0.289862 | -3.298201 | -1.506135 |
| 49 | 6  | 0 | 0.758025  | -3.528486 | -2.390426 |
| 50 | 6  | 0 | 2.061678  | -3.656418 | -1.923967 |
| 51 | 6  | 0 | 2.328963  | -3.552593 | -0.567406 |
| 52 | 1  | 0 | -0.843023 | -3.016578 | 0.561101  |
| 53 | 1  | 0 | -1.303174 | -3.203161 | -1.874846 |
| 54 | 1  | 0 | 0.557231  | -3.607733 | -3.451387 |
| 55 | 1  | 0 | 2.873924  | -3.832663 | -2.617157 |
| 56 | 1  | 0 | 3.336678  | -3.647475 | -0.185196 |
| 57 | 8  | 0 | 2.846478  | -3.823380 | 2.345912  |
| 58 | 8  | 0 | 0.396088  | -3.447748 | 2.781326  |

Radical *anti*-I<sup>•</sup> (Table S-2a)

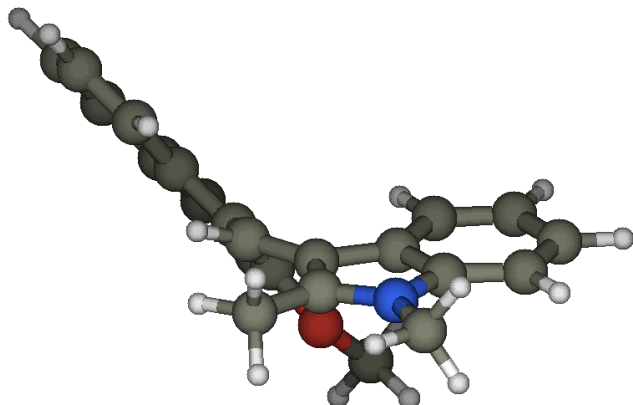

|    |   |   |           |           |           |
|----|---|---|-----------|-----------|-----------|
| 1  | 7 | 0 | 0.007571  | -0.007524 | 0.012296  |
| 2  | 6 | 0 | 0.002451  | 0.006147  | 1.379935  |
| 3  | 6 | 0 | 1.317652  | 0.013740  | 1.861026  |
| 4  | 6 | 0 | 2.164337  | -0.018693 | 0.681938  |
| 5  | 6 | 0 | 1.308748  | -0.028657 | -0.437180 |
| 6  | 6 | 0 | 1.778622  | -0.076083 | -1.747181 |
| 7  | 6 | 0 | 3.149346  | -0.136673 | -1.929219 |
| 8  | 6 | 0 | 4.021834  | -0.159795 | -0.831452 |
| 9  | 6 | 0 | 3.542096  | -0.102307 | 0.466345  |
| 10 | 6 | 0 | -1.271605 | 0.028588  | 2.144353  |
| 11 | 1 | 0 | -1.872639 | 0.902754  | 1.882305  |
| 12 | 1 | 0 | -1.873583 | -0.860437 | 1.940775  |
| 13 | 1 | 0 | -1.071550 | 0.070261  | 3.212070  |
| 14 | 6 | 0 | -1.140546 | -0.003221 | -0.866299 |
| 15 | 1 | 0 | 1.098230  | -0.073215 | -2.589611 |
| 16 | 1 | 0 | 3.552753  | -0.175550 | -2.933258 |
| 17 | 1 | 0 | 5.088994  | -0.223400 | -1.003715 |
| 18 | 1 | 0 | 4.231752  | -0.127187 | 1.300564  |
| 19 | 6 | 0 | 1.663851  | -0.060055 | 3.235392  |
| 20 | 6 | 0 | 2.914030  | 0.236264  | 3.868110  |
| 21 | 1 | 0 | 0.883581  | -0.426616 | 3.890361  |
| 22 | 6 | 0 | 3.745857  | 1.283457  | 3.437010  |
| 23 | 6 | 0 | 4.954267  | 1.586244  | 4.091263  |
| 24 | 6 | 0 | 5.335547  | 0.892379  | 5.208323  |
| 25 | 6 | 0 | 4.525488  | -0.145990 | 5.722647  |
| 26 | 6 | 0 | 3.320328  | -0.486397 | 5.051740  |
| 27 | 8 | 0 | 3.287344  | 2.035733  | 2.412013  |
| 28 | 1 | 0 | 5.572754  | 2.395200  | 3.728968  |
| 29 | 6 | 0 | 4.909354  | -0.857131 | 6.885967  |
| 30 | 6 | 0 | 2.570406  | -1.574559 | 5.564785  |
| 31 | 1 | 0 | 6.259889  | 1.140094  | 5.715912  |
| 32 | 6 | 0 | 4.143974  | -1.880235 | 7.372251  |
| 33 | 1 | 0 | 5.830176  | -0.571462 | 7.381905  |
| 34 | 1 | 0 | 4.445332  | -2.417635 | 8.262470  |
| 35 | 6 | 0 | 2.963657  | -2.245372 | 6.693387  |
| 36 | 1 | 0 | 1.678140  | -1.900782 | 5.048654  |
| 37 | 1 | 0 | 2.368364  | -3.072628 | 7.059647  |
| 38 | 1 | 0 | -1.131331 | -0.889025 | -1.503565 |
| 39 | 1 | 0 | -2.052155 | -0.006235 | -0.276113 |
| 40 | 1 | 0 | -1.131784 | 0.886767  | -1.497811 |
| 41 | 6 | 0 | 4.165229  | 2.950319  | 1.784673  |

|    |   |   |          |          |          |
|----|---|---|----------|----------|----------|
| 42 | 1 | 0 | 3.635722 | 3.320737 | 0.909374 |
| 43 | 1 | 0 | 4.405248 | 3.789527 | 2.442495 |
| 44 | 1 | 0 | 5.088728 | 2.459615 | 1.466507 |

**C<sub>6</sub>H<sub>5</sub>SO<sub>2</sub> radical 2a'** (Table S-2a)

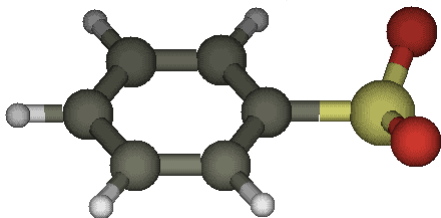

|    |    |   |           |           |           |
|----|----|---|-----------|-----------|-----------|
| 1  | 16 | 0 | -0.000325 | 0.009313  | 0.016485  |
| 2  | 6  | 0 | -0.000221 | 0.005036  | 1.796366  |
| 3  | 6  | 0 | 1.218592  | 0.000395  | 2.460427  |
| 4  | 8  | 0 | -1.273278 | 0.527832  | -0.449613 |
| 5  | 8  | 0 | 1.246432  | 0.587965  | -0.449393 |
| 6  | 6  | 0 | 1.208857  | -0.039683 | 3.846488  |
| 7  | 1  | 0 | 2.146818  | 0.042619  | 1.906670  |
| 8  | 1  | 0 | 2.145277  | -0.030557 | 4.388499  |
| 9  | 6  | 0 | 0.001963  | -0.090023 | 4.534381  |
| 10 | 6  | 0 | -1.205841 | -0.099481 | 3.846352  |
| 11 | 1  | 0 | 0.002745  | -0.123502 | 5.616411  |
| 12 | 6  | 0 | -1.217396 | -0.060090 | 2.460291  |
| 13 | 1  | 0 | -2.141650 | -0.136576 | 4.388251  |
| 14 | 1  | 0 | -2.146442 | -0.064025 | 1.906345  |

**1-pentene 1x** (Table S-2c)

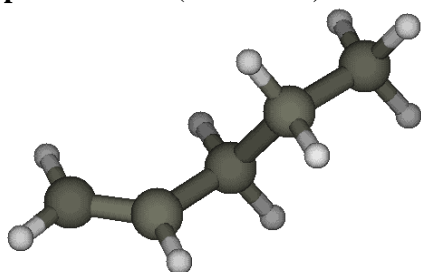

|    |   |   |           |           |           |
|----|---|---|-----------|-----------|-----------|
| 1  | 6 | 0 | -0.004005 | 0.000583  | -0.003659 |
| 2  | 6 | 0 | -0.002636 | 0.001136  | 1.322639  |
| 3  | 1 | 0 | 0.946621  | -0.000919 | -0.533692 |
| 4  | 1 | 0 | 0.920376  | -0.005114 | 1.890238  |
| 5  | 1 | 0 | -0.930018 | 0.005676  | 1.886858  |
| 6  | 6 | 0 | -1.230007 | 0.026463  | -0.861959 |
| 7  | 6 | 0 | -1.289948 | 1.266912  | -1.755928 |
| 8  | 1 | 0 | -1.241473 | -0.862398 | -1.502683 |
| 9  | 1 | 0 | -2.122536 | -0.018558 | -0.231679 |
| 10 | 6 | 0 | -2.512871 | 1.264540  | -2.662256 |
| 11 | 1 | 0 | -1.294880 | 2.159904  | -1.124963 |
| 12 | 1 | 0 | -0.380062 | 1.316684  | -2.360930 |
| 13 | 1 | 0 | -2.545999 | 2.156965  | -3.289195 |
| 14 | 1 | 0 | -2.508459 | 0.392275  | -3.319887 |
| 15 | 1 | 0 | -3.433190 | 1.233498  | -2.074624 |

**TS<sub>Add</sub> 2a' + 1x (Table S-2c) Imaginary Frequency 332.5 cm<sup>-1</sup>.**

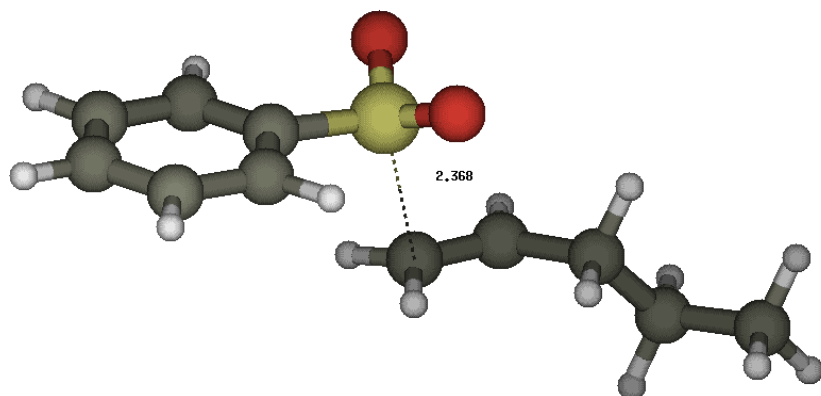

|    |    |   |           |           |           |
|----|----|---|-----------|-----------|-----------|
| 1  | 16 | 0 | -0.413500 | 0.252747  | 0.070899  |
| 2  | 6  | 0 | -0.132051 | 0.062814  | 1.813616  |
| 3  | 6  | 0 | 1.174986  | 0.034677  | 2.283760  |
| 4  | 8  | 0 | -1.752288 | 0.777293  | -0.127175 |
| 5  | 8  | 0 | 0.713197  | 0.967041  | -0.503084 |
| 6  | 6  | 0 | 1.390490  | -0.184137 | 3.636506  |
| 7  | 1  | 0 | 2.001595  | 0.197107  | 1.604356  |
| 8  | 1  | 0 | 2.401140  | -0.196904 | 4.023461  |
| 9  | 6  | 0 | 0.312200  | -0.382657 | 4.491131  |
| 10 | 6  | 0 | -0.988792 | -0.362395 | 4.001574  |
| 11 | 1  | 0 | 0.486906  | -0.554013 | 5.545701  |
| 12 | 6  | 0 | -1.220729 | -0.144974 | 2.651374  |
| 13 | 1  | 0 | -1.824796 | -0.513459 | 4.672094  |
| 14 | 1  | 0 | -2.226811 | -0.120258 | 2.253389  |
| 15 | 6  | 0 | -0.371939 | -1.916352 | -0.878428 |
| 16 | 6  | 0 | -0.675974 | -1.684791 | -2.185406 |
| 17 | 1  | 0 | 0.663343  | -2.056507 | -0.580048 |
| 18 | 1  | 0 | -1.129337 | -2.292586 | -0.198904 |
| 19 | 6  | 0 | 0.322767  | -1.320498 | -3.225914 |
| 20 | 1  | 0 | -1.719152 | -1.696409 | -2.488757 |
| 21 | 6  | 0 | 0.229040  | -2.210347 | -4.469565 |
| 22 | 1  | 0 | 0.146871  | -0.281024 | -3.532724 |
| 23 | 1  | 0 | 1.331313  | -1.363234 | -2.806588 |
| 24 | 6  | 0 | 1.222091  | -1.792013 | -5.544141 |
| 25 | 1  | 0 | 0.407702  | -3.249023 | -4.179657 |
| 26 | 1  | 0 | -0.789503 | -2.164169 | -4.864280 |
| 27 | 1  | 0 | 1.149190  | -2.434415 | -6.422918 |
| 28 | 1  | 0 | 1.039814  | -0.763324 | -5.862613 |
| 29 | 1  | 0 | 2.246974  | -1.848815 | -5.170899 |

**Radical adduct 4 (Table S-2c)**

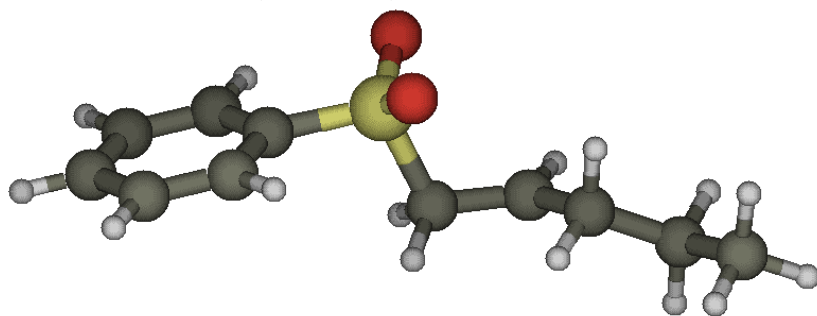

|    |    |   |           |           |           |
|----|----|---|-----------|-----------|-----------|
| 1  | 16 | 0 | -0.221265 | 0.152678  | 0.020270  |
| 2  | 6  | 0 | -0.085164 | 0.040475  | 1.780280  |
| 3  | 6  | 0 | 1.176221  | 0.057441  | 2.361494  |
| 4  | 8  | 0 | -1.531552 | 0.665136  | -0.305673 |
| 5  | 8  | 0 | 0.938916  | 0.850376  | -0.483800 |
| 6  | 6  | 0 | 1.280093  | -0.061987 | 3.739741  |
| 7  | 1  | 0 | 2.057230  | 0.175182  | 1.743753  |
| 8  | 1  | 0 | 2.255222  | -0.043985 | 4.208685  |
| 9  | 6  | 0 | 0.134177  | -0.198353 | 4.514290  |
| 10 | 6  | 0 | -1.121605 | -0.214178 | 3.918996  |
| 11 | 1  | 0 | 0.220306  | -0.289136 | 5.589680  |
| 12 | 6  | 0 | -1.238704 | -0.096125 | 2.541581  |
| 13 | 1  | 0 | -2.011205 | -0.313814 | 4.527129  |
| 14 | 1  | 0 | -2.209079 | -0.096277 | 2.062052  |
| 15 | 6  | 0 | -0.132487 | -1.566484 | -0.538785 |
| 16 | 6  | 0 | -0.245310 | -1.636861 | -2.007806 |
| 17 | 1  | 0 | 0.828286  | -1.931675 | -0.167359 |
| 18 | 1  | 0 | -0.950161 | -2.070932 | -0.020678 |
| 19 | 6  | 0 | 0.921059  | -1.425317 | -2.903224 |
| 20 | 1  | 0 | -1.239180 | -1.662296 | -2.437555 |
| 21 | 6  | 0 | 0.807672  | -2.193221 | -4.220134 |
| 22 | 1  | 0 | 1.025429  | -0.353956 | -3.131306 |
| 23 | 1  | 0 | 1.841789  | -1.706416 | -2.380880 |
| 24 | 6  | 0 | 1.993360  | -1.935866 | -5.138773 |
| 25 | 1  | 0 | 0.726726  | -3.262314 | -4.005706 |
| 26 | 1  | 0 | -0.120285 | -1.902759 | -4.720569 |
| 27 | 1  | 0 | 1.899772  | -2.489445 | -6.074245 |
| 28 | 1  | 0 | 2.072682  | -0.874161 | -5.382930 |
| 29 | 1  | 0 | 2.928624  | -2.238370 | -4.662253 |

**AcOH** (Table S-2c)

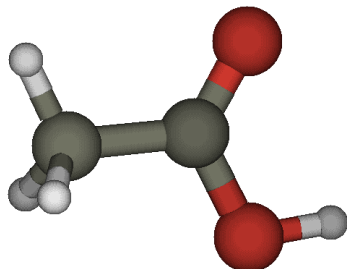

|   |   |   |           |           |           |
|---|---|---|-----------|-----------|-----------|
| 1 | 6 | 0 | -0.003251 | -0.000000 | -0.003226 |
| 2 | 8 | 0 | -0.000593 | -0.000000 | 1.338688  |
| 3 | 8 | 0 | 1.014892  | 0.000000  | -0.645053 |
| 4 | 6 | 0 | -1.390059 | -0.000000 | -0.561156 |
| 5 | 1 | 0 | -1.351281 | 0.000000  | -1.646278 |
| 6 | 1 | 0 | -1.924115 | -0.881009 | -0.202917 |
| 7 | 1 | 0 | -1.924115 | 0.881009  | -0.202917 |
| 8 | 1 | 0 | 0.923540  | 0.000000  | 1.640476  |

**AcO<sup>-</sup> anion** (Table S-2c)

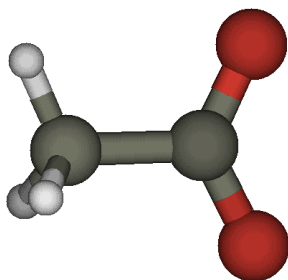


---

|   |   |   |           |           |           |
|---|---|---|-----------|-----------|-----------|
| 1 | 6 | 0 | 0.020397  | -0.007537 | 0.007678  |
| 2 | 8 | 0 | -0.010415 | -0.191252 | 1.245715  |
| 3 | 8 | 0 | 1.030975  | 0.206103  | -0.697358 |
| 4 | 6 | 0 | -1.340582 | -0.044746 | -0.706146 |
| 5 | 1 | 0 | -1.238340 | 0.067079  | -1.784640 |
| 6 | 1 | 0 | -1.847407 | -0.985902 | -0.484412 |
| 7 | 1 | 0 | -1.971468 | 0.759017  | -0.319970 |

---

**AcONA** (Table S-2c)

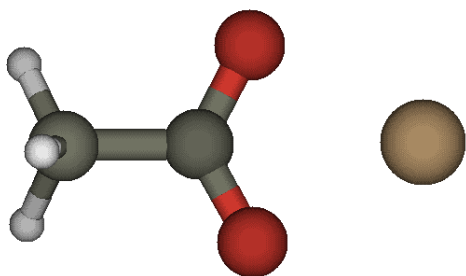


---

|   |    |   |           |           |           |
|---|----|---|-----------|-----------|-----------|
| 1 | 6  | 0 | -0.012163 | 0.002630  | 0.008184  |
| 2 | 8  | 0 | 0.013380  | 0.252375  | 1.242386  |
| 3 | 8  | 0 | 1.018580  | -0.251807 | -0.670549 |
| 4 | 6  | 0 | -1.352821 | -0.026070 | -0.697057 |
| 5 | 1  | 0 | -1.259396 | 0.363378  | -1.709589 |
| 6 | 1  | 0 | -1.678451 | -1.066587 | -0.768150 |
| 7 | 1  | 0 | -2.101674 | 0.533684  | -0.140898 |
| 8 | 11 | 0 | 2.223504  | -0.006768 | 1.181311  |

---

**Product C<sub>6</sub>H<sub>5</sub>SO<sub>2</sub>CH<sub>2</sub>CH<sub>2</sub>CH<sub>2</sub>CH<sub>2</sub>CH<sub>3</sub> 3** (Table S-2c)

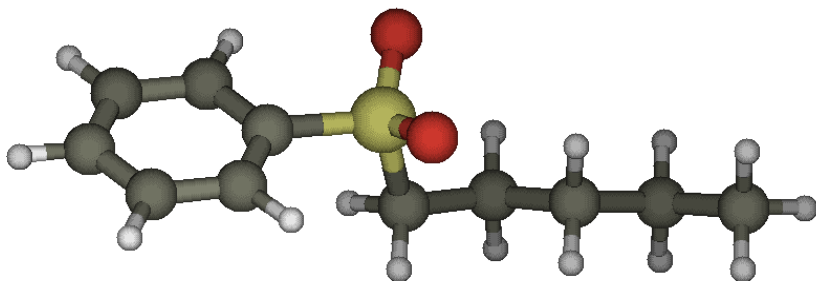


---

|   |    |   |           |           |           |
|---|----|---|-----------|-----------|-----------|
| 1 | 16 | 0 | -0.105847 | 0.087823  | 0.018511  |
| 2 | 6  | 0 | -0.040301 | 0.030459  | 1.787607  |
| 3 | 6  | 0 | 1.196840  | 0.027843  | 2.417504  |
| 4 | 8  | 0 | -1.377872 | 0.654054  | -0.368316 |
| 5 | 8  | 0 | 1.104045  | 0.725070  | -0.447914 |
| 6 | 6  | 0 | 1.243259  | -0.034461 | 3.803178  |

---

|    |   |   |           |           |           |
|----|---|---|-----------|-----------|-----------|
| 7  | 1 | 0 | 2.104593  | 0.085644  | 1.830885  |
| 8  | 1 | 0 | 2.199638  | -0.032123 | 4.309555  |
| 9  | 6 | 0 | 0.064396  | -0.092836 | 4.536246  |
| 10 | 6 | 0 | -1.167473 | -0.087648 | 3.892103  |
| 11 | 1 | 0 | 0.105247  | -0.138277 | 5.617181  |
| 12 | 6 | 0 | -1.226374 | -0.027202 | 2.507611  |
| 13 | 1 | 0 | -2.082873 | -0.125915 | 4.468071  |
| 14 | 1 | 0 | -2.176748 | -0.012247 | 1.989701  |
| 15 | 6 | 0 | -0.094670 | -1.630082 | -0.457593 |
| 16 | 6 | 0 | -0.496245 | -1.839089 | -1.913417 |
| 17 | 1 | 0 | 0.912124  | -1.993905 | -0.243295 |
| 18 | 1 | 0 | -0.799354 | -2.121038 | 0.216050  |
| 19 | 6 | 0 | 0.449201  | -1.227197 | -2.940716 |
| 20 | 1 | 0 | -1.508167 | -1.454990 | -2.061195 |
| 21 | 6 | 0 | 0.080825  | -1.626649 | -4.364481 |
| 22 | 1 | 0 | 0.436501  | -0.137128 | -2.857899 |
| 23 | 1 | 0 | 1.476043  | -1.541774 | -2.725541 |
| 24 | 6 | 0 | 1.007230  | -1.005184 | -5.400541 |
| 25 | 1 | 0 | 0.108178  | -2.717132 | -4.451044 |
| 26 | 1 | 0 | -0.951616 | -1.324742 | -4.565015 |
| 27 | 1 | 0 | 0.731384  | -1.302180 | -6.413668 |
| 28 | 1 | 0 | 0.971866  | 0.085318  | -5.349425 |
| 29 | 1 | 0 | 2.042017  | -1.311860 | -5.231356 |
| 30 | 1 | 0 | -0.544697 | -2.920871 | -2.064797 |

Complex CA AcOH + 4 (Table S-2c)

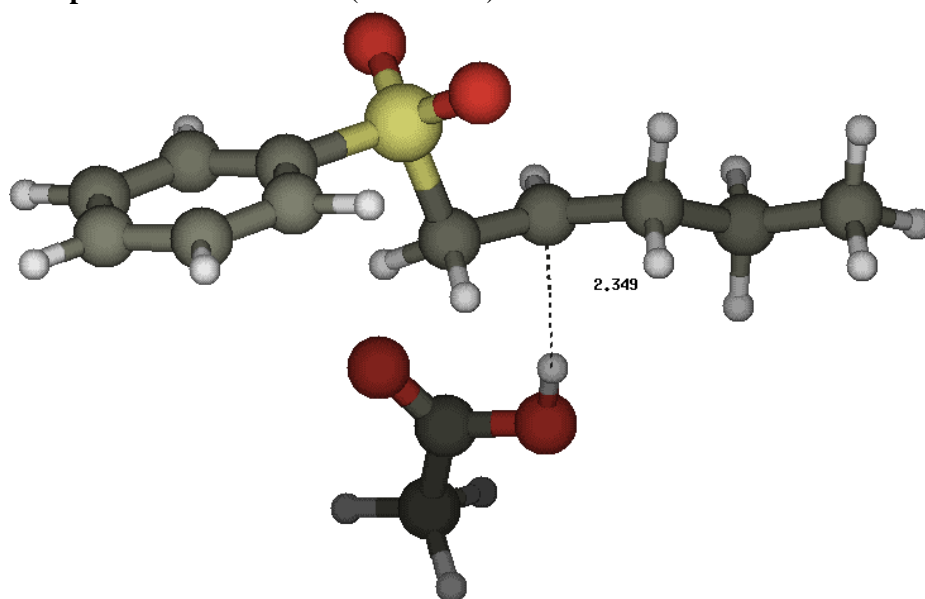

|    |    |   |           |           |           |
|----|----|---|-----------|-----------|-----------|
| 1  | 16 | 0 | 0.046795  | 0.020412  | -0.002279 |
| 2  | 6  | 0 | 0.018437  | 0.007065  | 1.765849  |
| 3  | 6  | 0 | 1.213268  | -0.130183 | 2.459788  |
| 4  | 8  | 0 | -1.098238 | 0.762475  | -0.474375 |
| 5  | 8  | 0 | 1.362486  | 0.430825  | -0.434999 |
| 6  | 6  | 0 | 1.181180  | -0.165698 | 3.846469  |
| 7  | 1  | 0 | 2.149605  | -0.194836 | 1.920837  |
| 8  | 1  | 0 | 2.104144  | -0.264883 | 4.402790  |
| 9  | 6  | 0 | -0.032277 | -0.068633 | 4.516637  |
| 10 | 6  | 0 | -1.220698 | 0.066675  | 3.808291  |
| 11 | 1  | 0 | -0.051998 | -0.095086 | 5.598820  |
| 12 | 6  | 0 | -1.202081 | 0.104404  | 2.421924  |



|    |   |   |           |           |           |
|----|---|---|-----------|-----------|-----------|
| 13 | 1 | 0 | -2.162439 | 0.147352  | 4.335308  |
| 14 | 1 | 0 | -2.116889 | 0.218764  | 1.854650  |
| 15 | 6 | 0 | -0.183912 | -1.713971 | -0.451982 |
| 16 | 6 | 0 | -0.247050 | -1.861665 | -1.921899 |
| 17 | 1 | 0 | 0.667284  | -2.235455 | -0.007263 |
| 18 | 1 | 0 | -1.110615 | -2.017979 | 0.037386  |
| 19 | 6 | 0 | 0.977872  | -1.866904 | -2.764281 |
| 20 | 1 | 0 | -1.204276 | -1.677520 | -2.397946 |
| 21 | 6 | 0 | 0.785160  | -2.565429 | -4.109137 |
| 22 | 1 | 0 | 1.289411  | -0.827922 | -2.950882 |
| 23 | 1 | 0 | 1.804889  | -2.326108 | -2.212426 |
| 24 | 6 | 0 | 2.029059  | -2.482207 | -4.981760 |
| 25 | 1 | 0 | 0.523456  | -3.613665 | -3.938245 |
| 26 | 1 | 0 | -0.064057 | -2.110518 | -4.626549 |
| 27 | 1 | 0 | 1.880560  | -2.991930 | -5.934742 |
| 28 | 1 | 0 | 2.286537  | -1.442010 | -5.192795 |
| 29 | 1 | 0 | 2.885467  | -2.943236 | -4.484544 |
| 30 | 1 | 0 | -1.082026 | -4.054294 | -2.025334 |
| 31 | 8 | 0 | -1.604021 | -4.877433 | -2.070695 |
| 32 | 6 | 0 | -2.632391 | -4.772432 | -1.218295 |
| 33 | 8 | 0 | -2.804354 | -3.793653 | -0.536548 |
| 34 | 6 | 0 | -3.500992 | -5.988607 | -1.230755 |
| 35 | 1 | 0 | -4.314781 | -5.868891 | -0.522309 |
| 36 | 1 | 0 | -3.895479 | -6.139086 | -2.236292 |
| 37 | 1 | 0 | -2.902607 | -6.863542 | -0.974601 |

---

**Complex CB AcO<sup>-</sup> + 3** (Table S-2c)

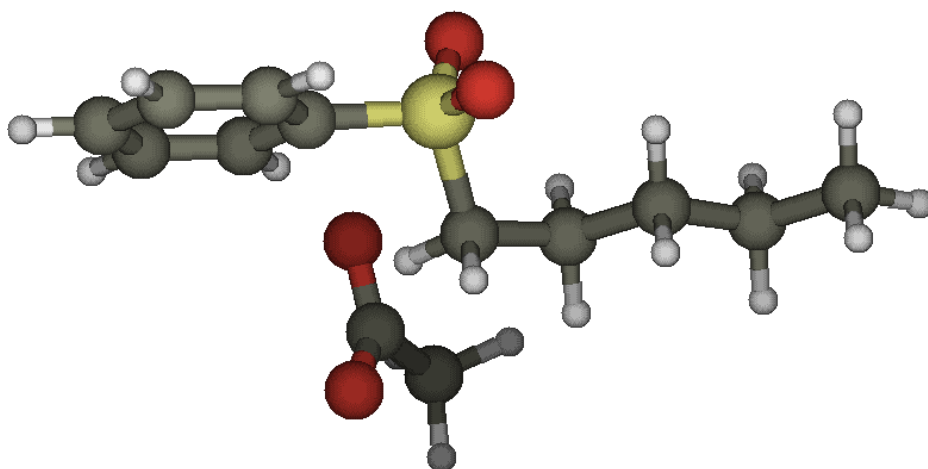

|    |    |   |           |           |           |
|----|----|---|-----------|-----------|-----------|
| 1  | 16 | 0 | -0.073271 | 0.190660  | 0.010898  |
| 2  | 6  | 0 | -0.014020 | 0.057753  | 1.780020  |
| 3  | 6  | 0 | 1.217551  | -0.010697 | 2.412376  |
| 4  | 8  | 0 | -0.797119 | 1.397466  | -0.324851 |
| 5  | 8  | 0 | 1.281858  | 0.065907  | -0.486015 |
| 6  | 6  | 0 | 1.256952  | -0.070493 | 3.799950  |
| 7  | 1  | 0 | 2.125810  | -0.015162 | 1.824346  |
| 8  | 1  | 0 | 2.210832  | -0.120716 | 4.309117  |
| 9  | 6  | 0 | 0.074688  | -0.070810 | 4.527722  |
| 10 | 6  | 0 | -1.153524 | -0.011616 | 3.876491  |
| 11 | 1  | 0 | 0.108353  | -0.122320 | 5.608883  |
| 12 | 6  | 0 | -1.209055 | 0.056679  | 2.492535  |
| 13 | 1  | 0 | -2.072775 | -0.021376 | 4.448075  |
| 14 | 1  | 0 | -2.164539 | 0.085330  | 1.971908  |
| 15 | 6  | 0 | -1.035521 | -1.219894 | -0.484329 |

|    |   |   |           |           |           |
|----|---|---|-----------|-----------|-----------|
| 16 | 6 | 0 | -1.659121 | -1.052384 | -1.862688 |
| 17 | 1 | 0 | -0.352798 | -2.070411 | -0.430022 |
| 18 | 1 | 0 | -1.818885 | -1.340020 | 0.266500  |
| 19 | 6 | 0 | -0.666108 | -0.956563 | -3.014446 |
| 20 | 1 | 0 | -2.309400 | -0.174670 | -1.848019 |
| 21 | 6 | 0 | -1.357664 | -0.935364 | -4.372133 |
| 22 | 1 | 0 | -0.056529 | -0.054122 | -2.906178 |
| 23 | 1 | 0 | 0.025999  | -1.804686 | -2.970478 |
| 24 | 6 | 0 | -0.371887 | -0.837896 | -5.528447 |
| 25 | 1 | 0 | -1.964272 | -1.839870 | -4.479168 |
| 26 | 1 | 0 | -2.051977 | -0.090381 | -4.406471 |
| 27 | 1 | 0 | -0.883725 | -0.825439 | -6.492273 |
| 28 | 1 | 0 | 0.225528  | 0.073667  | -5.454349 |
| 29 | 1 | 0 | 0.316271  | -1.686527 | -5.525666 |
| 30 | 1 | 0 | -2.307778 | -1.921432 | -2.008462 |
| 31 | 8 | 0 | -3.634606 | -2.586074 | 0.834614  |
| 32 | 6 | 0 | -4.268748 | -1.573099 | 0.462520  |
| 33 | 8 | 0 | -3.994386 | -0.382024 | 0.743790  |
| 34 | 6 | 0 | -5.483514 | -1.790172 | -0.447173 |
| 35 | 1 | 0 | -6.341632 | -1.236363 | -0.063594 |
| 36 | 1 | 0 | -5.259368 | -1.392157 | -1.439879 |
| 37 | 1 | 0 | -5.737313 | -2.845288 | -0.537566 |

---
